# Supplementary material for: Protocol of a randomised trial of teriparatide followed by zoledronic acid to reduce fracture risk in adults with osteogenesis imperfecta
Source: PubMed Central journal article supplement — BMJ Open. 2023 Nov 22;13(11):e078164. doi: 10.1136/bmjopen-2023-078164 (PMC10668140; doi:10.1136/bmjopen-2023-078164), 2023-11-22
Supplement: bmjopen-2023-078164.draft_revisions.pdf [file bmjopen-2023-078164.draft_revisions.pdf]

# BMJ Open

BMJ Open is committed to open peer review. As part of this commitment we make the peer review history of every article we publish publicly available.

When an article is published we post the peer reviewers' comments and the authors' responses online. We also post the versions of the paper that were used during peer review. These are the versions that the peer review comments apply to.

The versions of the paper that follow are the versions that were submitted during the peer review process. They are not the versions of record or the final published versions. They should not be cited or distributed as the published version of this manuscript.

BMJ Open is an open access journal and the full, final, typeset and author-corrected version of record of the manuscript is available on our site with no access controls, subscription charges or pay-per-view fees (<http://bmjopen.bmj.com>).

If you have any questions on BMJ Open's open peer review process please email [info.bmjopen@bmj.com](mailto:info.bmjopen@bmj.com)

# BMJ Open

## Protocol of a randomised trial of teriparatide followed by zoledronic acid to reduce fracture risk in adults with osteogenesis imperfecta.

|                               |                                                                                                                                                                                                                                                                                                                                                                                                                                                                                                                                                                                                                                                                                                       |
|-------------------------------|-------------------------------------------------------------------------------------------------------------------------------------------------------------------------------------------------------------------------------------------------------------------------------------------------------------------------------------------------------------------------------------------------------------------------------------------------------------------------------------------------------------------------------------------------------------------------------------------------------------------------------------------------------------------------------------------------------|
| Journal:                      | <i>BMJ Open</i>                                                                                                                                                                                                                                                                                                                                                                                                                                                                                                                                                                                                                                                                                       |
| Manuscript ID                 | bmjopen-2023-078164                                                                                                                                                                                                                                                                                                                                                                                                                                                                                                                                                                                                                                                                                   |
| Article Type:                 | Protocol                                                                                                                                                                                                                                                                                                                                                                                                                                                                                                                                                                                                                                                                                              |
| Date Submitted by the Author: | 25-Jul-2023                                                                                                                                                                                                                                                                                                                                                                                                                                                                                                                                                                                                                                                                                           |
| Complete List of Authors:     | Hald, Jannie ; Aarhus University Hospital, Dept of Endocrinology and Internal Medicine<br>Keerie, Catriona; University of Edinburgh College of Medicine and Veterinary Medicine<br>Weir, Christopher; The University of Edinburgh<br>Javaid, Kassim; University of Oxford, Oxford NIHR Musculoskeletal Biomedical Research Unit<br>Lam, Wayne; University of Edinburgh Western General Hospital, Centre for Genomic and Experimental Medicine<br>Osborne, Patricia; Brittle Bone Society<br>Walsh, Jennifer; The University of Sheffield, Oncology and Metabolism<br>Langdahl, Bente L.; Aarhus Universitet, Dept of Endocrinology and Internal Medicine<br>Ralston, Stuart; Western General Hospital |
| Keywords:                     | Randomized Controlled Trial, INTERNAL MEDICINE, RHEUMATOLOGY                                                                                                                                                                                                                                                                                                                                                                                                                                                                                                                                                                                                                                          |
|                               |                                                                                                                                                                                                                                                                                                                                                                                                                                                                                                                                                                                                                                                                                                       |

SCHOLARONE™  
Manuscripts

1  
2  
3 **Protocol of a randomised trial of teriparatide followed by zoledronic acid to reduce**  
4 **fracture risk in adults with osteogenesis imperfecta.**  
5  
6  
7

8 Jannie D Hald<sup>1</sup>, Catriona Keerie<sup>2</sup>, Christopher J. Weir<sup>2</sup>, M Kassim Javaid<sup>3</sup>, Wayne Lam<sup>4</sup>, Patricia  
9 Osborne<sup>5</sup>, Jennifer Walsh<sup>6</sup>, Bente Langdahl<sup>1</sup>, Stuart H. Ralston<sup>7</sup>  
10  
11

- 12  
13  
14 1 Dept of Endocrinology and Internal Medicine, Aarhus University Hospital, 8200 Aarhus N,  
15 Denmark  
16 2 Edinburgh Clinical Trials Unit, Usher Institute, University of Edinburgh, Nine Edinburgh  
17 Bioquarter, Little France Road, Edinburgh, EH16 4UX, United Kingdom  
18 3 Botnar Research Centre, Nuffield Department of Orthopaedics, Rheumatology &  
19 Musculoskeletal Sciences, University of Oxford, Oxford, UK  
20 4 Brittle Bone Society, Dundee  
21 5 Southeast Scotland Clinical Genetics Service, Western General Hospital, Edinburgh  
22 6 Mellanby Centre for Bone Research, University of Sheffield, Sheffield, UK  
23 7 Centre for Genomic and Experimental Medicine, Institute of Genetics and Cancer  
24 University of Edinburgh, Western General Hospital, Edinburgh, EH 2XU, United Kingdom.  
25  
26

27 Corresponding author:

28 Professor Stuart H Ralston  
29 Centre for Genomic and Experimental Medicine,  
30 Institute of Genetics and Molecular Medicine,  
31 University of Edinburgh,  
32 Western General Hospital,  
33 Edinburgh, EH 2XU, United Kingdom.  
34 Email: [stuart.ralston@ed.ac.uk](mailto:stuart.ralston@ed.ac.uk)  
35  
36  
37  
38  
39  
40  
41  
42  
43  
44  
45  
46  
47  
48  
49  
50  
51  
52  
53  
54  
55  
56  
57  
58  
59  
60

**ABSTRACT**

**Introduction:** Osteogenesis imperfecta (OI) is a rare genetic disease associated with multiple fractures throughout life. It is often treated with osteoporosis medications but their effectiveness at preventing fractures is unknown. The Treatment of Osteogenesis Imperfecta with Parathyroid Hormone and Zoledronic Acid (TOPAZ) trial will determine if therapy with teriparatide (TPTD) followed by zoledronic acid (ZA) can reduce the risk of clinical fractures in OI.

**Methods and analysis:** Individuals aged  $\geq 18$  years with a clinical diagnosis of OI are eligible to take part. At baseline, participants will undergo a spine x-ray, and have bone mineral density (BMD) measured by dual x-ray energy absorptiometry (DXA) at the spine and hip. Information on previous fractures, and previous bone targeted treatments will be collected. Questionnaires will be completed to assess pain and other aspects of health related quality of life (HRQoL). Participants will be randomised to receive a two year course of TPTD injections 20mcg daily followed by a single intravenous infusion of 5mg Zoledronic acid (ZA), or to receive standard care, which will exclude the use of bone anabolic drugs. Participants will be followed up annually, have a repeat DXA at 2 years and at the end of study. Spine x-rays will be repeated at the end of study. The duration of follow-up will range between two and eight years.

The primary endpoint will be new clinical fractures confirmed by x-ray or other imaging. Secondary endpoints will include participant reported fractures, BMD and changes in pain and HRQoL.

**Ethics and Dissemination:** The study received ethical approval in December 2016. Following completion of the trial, a manuscript will be submitted to a peer-reviewed journal. The results will inform clinical practice by determining if TPTD/ZA can reduce the risk of fractures in OI compared with standard care.

**Trial registration number:** ISRCTN15313991. Pre-results.

Abstract: 297 words

Total word count: 4718

**Strengths and limitations**

- This is the first randomised controlled trial to determine whether any medical treatment can reduce the risk of fractures in osteogenesis imperfecta.
- The inclusion of all adults with a clinical diagnosis of OI ensures that the results will have external validity and be widely applicable to adults with OI
- The choice of TPTD followed by zoledronic acid is expected to give a sustained anabolic response in the active group and to provide proof of concept that anabolic agents are superior to no active treatment or other bone targeted therapies which work by inhibiting bone resorption.
- The randomised design with adjudication of the primary endpoint by observers blinded to treatment allocation will eliminate assessment bias.

**Keywords:**

Osteogenesis imperfecta, bisphosphonate; zoledronic acid; teriparatide; randomized controlled trial.

## INTRODUCTION

Osteogenesis imperfecta is the term used to describe a group of inherited disorders characterised by multiple low trauma fractures, first presenting early in life. Depending on the subtype, other features may be observed such as bone deformity, growth retardation, dental abnormalities, blue sclera, hearing loss and ligament laxity. The Sillence classification, devised in 1979 (1), divided patients with OI into four subtypes based on clinical severity, ranging from mild (Type I) to moderate (Type IV) severe (Type III) and lethal (Type II). As new genes for osteogenesis imperfecta have been discovered a new classification system has emerged (2) which introduces new subtypes related to the underlying genetic abnormality while retaining the Sillence classification for defects associated with mutations in the type 1 collagen genes. Irrespective of the underlying genetic cause, bone fragility is greatly increased in osteogenesis imperfecta. Reduced bone mass (3) and abnormalities of cortical thickness and trabecular architecture play a role (4) but these abnormalities are compounded by defects in bone matrix, which profoundly affect bone quality. There is also evidence that rates of bone turnover are abnormally increased particularly in types III and IV OI (4) (5). A puzzling feature of OI that remains poorly understood is increased mineralisation of bone. This was first described by Boyde and colleagues (6), but subsequently had been confirmed in most types of OI by various investigators (7-11). This has relevance to the pathogenesis of fractures since bone that is highly mineralised is also more brittle.

The medical management of osteogenesis imperfecta is currently based on giving drugs that are used to treat osteoporosis, working on the assumption that medications which increase bone density and/or reduce bone turnover might favourably influence clinical outcome and reduce fracture risk. The most widely used drugs are bisphosphonates. Randomised controlled trials of bisphosphonates in OI have consistently shown that BMD is increased, and biochemical markers of bone turnover decreased as compared with no treatment or placebo (12-14). The effects of bisphosphonates on fracture are conflicting, however. Successive Cochrane reviews (12-14) and a meta-analysis of randomised trials (15) have concluded that the effects of bisphosphonates on fracture rate are uncertain while also acknowledging that the studies performed so far have been underpowered to detect a reduction in fracture incidence. A possible reason for the disappointing results with bisphosphonates is that they increase mineralisation of bone (16) which might cause the bone to be more brittle. Teriparatide has been evaluated in one study of patients with OI compared with placebo (17). This showed an increase in BMD and a numerical reduction in the incidence of new fractures, but this was not statistically significant. Like the bisphosphonate trials, this study was not powered to detect a reduction in fracture incidence.

1  
2  
3 This study is the first trial ever attempted in OI where reduction in fracture incidence has been the  
4 primary outcome.  
5

## 6 **METHODS AND ANALYSIS**

7  
8 The TOPAZ trial is a multicentre open label randomised parallel group trial which has been designed  
9 to determine if a two year course of anabolic therapy with TPTD followed by a single infusion of  
10 zoledronic acid (ZA) to maintain the increase in BMD is superior to standard care at reducing the risk  
11 of new clinical fractures in adults with osteogenesis imperfecta. The participants and investigators will  
12 not be blinded to treatment allocation, but ascertainment of fractures will be performed by imaging  
13 experts who are blinded to treatment allocation. The TOPAZ trial is therefore an example of a  
14 Prospective, randomized open, blinded end-point (PROBE) study design. A graphical overview of the  
15 study design and participant timelines is provided in Figure 1. The primary objective of the study is to  
16 determine if TPD/ZA reduces the risk of clinical fractures in OI compared with standard care,  
17 Secondary objectives are to determine if TPTD/ZA reduces the risk of participant reported fractures,  
18 all fractures (participant reported and imaging confirmed) and vertebral fractures. The study also aims  
19 to determine if TPTD/ZA increases BMD compared with standard care, and to determine if it  
20 favourably affects quality of life, pain and sleep quality.  
21  
22  
23  
24  
25  
26  
27  
28  
29

### 30 **Eligibility criteria**

31 Those eligible will be 18 years of age or older, with a clinical diagnosis of osteogenesis imperfecta.  
32 Eligibility and exclusion criteria are summarised in Table 1. Women of childbearing potential will be  
33 permitted to take part in the study provided that they agree to practice a medically robust form of  
34 contraception (an intra-uterine device, a barrier method with spermicide, condoms, subdermal  
35 implant or oral contraceptive) during TPTD treatment and for at least 12 months after the ZA infusion.  
36 Women who are pregnant or lactating at the time of randomisation will be excluded. In the event that  
37 a woman becomes pregnant or is lactating during the study, bone-targeted medicines will be stopped  
38 – with the exception of calcium supplements and vitamin D supplements - until the patient is no longer  
39 pregnant and has ceased lactating.  
40  
41  
42  
43  
44  
45  
46

### 47 **Study assessments**

48 The schedule of assessments which will be collected at baseline and during the study are summarised  
49 in Table 2 and are discussed individually in more detail below.  
50

#### 51 *Clinical assessment*

52 Participants will undergo a clinical assessment and physical examination at the baseline visit.  
53 Information will be collected on subtype of OI, family history of OI, presence bone deformity, use of a  
54 hearing aid, presence of dentinogenesis imperfecta, colour of sclerae, height, weight, past medical  
55 history, alcohol use and smoking habit, dietary calcium intake by food frequency questionnaire,  
56  
57  
58  
59  
60

1  
2  
3 current medications and any bone specific medications received during the previous two years.  
4  
5 Participants will be re-evaluated clinically after two years and again at the end of trial visit.

#### 6 *Bone Mineral Density*

7  
8 Bone mineral density (BMD) will be measured by dual energy x-ray absorptiometry (DXA) at the  
9  
10 lumbar spine and hip according to standard techniques at the participating centres. Measurements  
11  
12 will be performed at baseline, after 2 years and at the end of the study. Participants in whom DXA is  
13  
14 not feasible for technical reasons such as in patients with metalwork in situ as the result of previous  
15  
16 fractures or because of multiple vertebral fractures will be included in the study. These individuals  
17  
18 will be considered to have a BMD T-Score of <-2.5 for the purpose of minimisation.

#### 18 *Spine x-rays*

19  
20 Lateral x-rays of the lumbar and thoracic spine will be performed according to standard techniques at  
21  
22 baseline and at the end of study to detect the presence of existing and emergence of new vertebral  
23  
24 fractures. These images will be adjudicated by imaging experts blinded to treatment allocation who  
25  
26 will record the site and severity of vertebral fractures at baseline and evaluate whether new fractures  
27  
28 or worsening of existing fractures has occurred at the end of study.

#### 28 *Imaging of suspected fractures*

29  
30 Participants who develop symptoms or signs to suggest that a new fracture has occurred during the  
31  
32 study will have imaging by x-ray or another imaging modality to evaluate whether a fracture has  
33  
34 occurred. These images will be adjudicated by an imaging expert blinded to treatment allocation who  
35  
36 will record the site of fracture.

#### 36 *Safety bloods*

37  
38 Measurements of safety bloods will include serum creatinine, serum total alkaline phosphatase,  
39  
40 calcium, albumin and 25(OH)D. The estimated GFR (eGFR) will be calculated from serum creatinine,  
41  
42 gender and weight.

#### 42 *Specialised markers of bone turnover*

43  
44 Serum samples will be collected and stored for measurement of biochemical markers of bone turnover  
45  
46 at baseline, 24 months and at the end of study. The markers to be assessed will include serum type I  
47  
48 collagen C-telopeptides (CTX) as a marker of bone resorption and procollagen type I amino-terminal  
49  
50 propeptide (PINP) as a marker of bone formation. These samples will be aliquoted and stored locally  
51  
52 at -80°C and shipped on dry ice to the central laboratory.

#### 52 *Health related quality of life*

53  
54 Health-related quality of life will be assessed by completion of the SF36 questionnaire (18), the  
55  
56 Stanford Health Assessment Questionnaire (HAQ) (19) and the EuroQol 5D (EQ5D) (20) questionnaire  
57  
58 at baseline, annual visits and the end of study visit.  
59  
60



### *Pain*

The presence and location of pain will be assessed by completion of the Brief Pain Inventory (BPI) (21) at baseline, annual visits and the end of study visit.

### *Sleep quality*

Sleep quality will be assessed by the Pittsburgh Sleep Quality Index (PSQI) questionnaire (22)

### *Genetic testing*

Genetic testing will be carried out by the NHS Molecular Genetics Laboratory in Edinburgh on genomic DNA extracted from peripheral blood. The testing will be carried out using a custom-designed Bioscience panel for library construction and enrichment, followed by pair-end DNA sequencing using an Illumina MiSeq platform. This will be used to sequence the coding regions (+/- 15bp) of the following 16 genes implicated in the pathogenesis of osteogenesis imperfecta: *BMP1*, *COL1A1*, *COL1A2*, *CRTAP*, *FKBP10*, *IFITM5*, *PH31*, *PLOD2*, *PLS3*, *PPIB*, *SERPINF1*, *SERPINH1*, *SP7*, *SPARC*, *TMEM38B* and *WNT1*. Any pathogenic variants will be confirmed by Sanger sequencing using standard techniques.

### **Outcome measures**

The outcome measures are summarised in Table 3. The primary outcome will be the proportion of participants experiencing a clinical fracture validated by x-ray or other imaging. Secondary outcomes will include the total number of new fractures (participant reported and imaging validated combined), participant reported fractures (whether or not validated by imaging), the number of new vertebral fractures, changes in BMD, and biochemical markers of bone turnover, changes in bone pain, assessed by the BPI and changes in quality-of-life measures (EQ5D, HAQ, and SF36) and changes in sleep quality assessed by the PSQI.

### **Interventions**

The investigational medicinal products (IMP) in the active arm will be teriparatide (Forsteo®) given by subcutaneous injection in a dose of 20mcg daily for two years supplied by Eli Lilly Pharmaceuticals. This will be followed by a single dose zoledronic acid 5mg given by intravenous infusion over a period of not less than 15minutes. It is permissible for participants to temporarily stop (defined as  $\geq 3$  consecutive days) TPTD during the treatment period for up to 12 weeks. If this occurs the duration of the interruption and reason will be logged in the trial database. An interruption of greater than 12weeks will be considered a permanent discontinuation. Participants who permanently discontinue TPTD before 12 months will revert to receiving standard care. Those who receive 12 months or more will be invited to attend for a ZA infusion or treatment with an alternative antiresorptive agent within 4 weeks of stopping therapy. For participants with a body weight <30kg the dose of TPTD will be reduced to 20mcg given twice weekly by subcutaneous

1  
2  
3 injection for 24 months. Treatment will be followed by an infusion of ZA in a dose of 0.10 mg/Kg  
4 over 15 minutes within 4 weeks of the last TPTD dose. If TPTD therapy needs to be discontinued  
5 before 12 months for any reason, the participant will not routinely be given ZA on termination of  
6 TPTD therapy but instead revert to receiving standard care.  
7  
8

9  
10 In the standard care arm, participants may be treated with oral or intravenous bisphosphonates,  
11 denosumab, calcium supplements, vitamin D supplements or combined calcium and vitamin D  
12 supplements at the discretion of investigators at study sites. Participants who are sexually active will  
13 receive specific advice about the possible risks associated with getting pregnant whilst in the trial  
14 and will be asked to agree to practice a medically acceptable form of birth control during the study if  
15 receiving bone targeted therapies with the exception of calcium and vitamin D.  
16  
17

18  
19 In the active group, information on adherence to TPTD will be gathered using participant diaries. In  
20 the standard care group, participants will also be asked to record treatment with bone targeted  
21 medications throughout the study.  
22  
23

#### 24 25 **Prohibited medications**

26 Treatment with investigational medicinal products with effects on bone metabolism will be  
27 prohibited in both groups. In the standard care arm bone anabolic agents such as TPTD and  
28 romosozumab will be prohibited. During the phase of treatment with TPTD, the following drugs will  
29 be prohibited; bisphosphonates, denosumab, strontium ranelate, calcitonin, romosozumab and  
30 investigational (experimental) drugs with effects on bone metabolism. These drugs will also be  
31 prohibited within 36 months of receiving ZA to avoid over suppression of bone turnover. An  
32 exception would be if for any reason ZA cannot be given to maintain the increase in BMD following  
33 TPTD. In this case an alternative antiresorptive agent (including denosumab within this context only)  
34 may be given on discussion with the co-ordinating centre.  
35  
36  
37  
38  
39  
40

#### 41 42 **Permitted Interventions and Medications**

43 Participants can continue to receive non-pharmacological interventions and medicines used as part  
44 of normal medical care throughout the study.  
45  
46

#### 47 48 **Recruitment and randomisation**

49 The main route of recruitment to the study will be through the potential participants' normal care  
50 providers, in secondary care referral centres. A full list of study sites can be obtained at the ISRCTN  
51 registry. Potential participants will be approached directly as they attend for routine outpatient clinic  
52 visits or by telephone or letter following review of clinic lists. Potential participants, who become  
53 aware of the study through other routes such as social media, the websites of the BBS or OIFE, or word  
54 of mouth, will be invited to contact the research team at the co-ordinating centre or their nearest  
55 study centre if they are interested in taking part. Following such contact, they will be provided with  
56  
57  
58  
59  
60

1  
2  
3 information about the trial. Written informed consent will be obtained from all participants by the  
4 local principle investigator or a delegated member of the study team. Whilst OI is a rare disease we  
5 expect that it should be possible to reach the target sample size in view of the simplicity of the study  
6 design and the fact that both groups have the option of receiving some form of active treatment if  
7 they so wish.  
8  
9

10  
11 Randomisation will be performed by a web based tool hosted by Edinburgh Clinical Trials Unit (ECTU)  
12 which ensures allocation concealment prior to enrolment. The randomisation algorithm uses  
13 minimisation to ensure that the groups are balanced for prognostic variables thought to influence the  
14 occurrence of fractures. These comprise clinical fracture in last 2 years, OI clinical subtype (type I vs.  
15 other subtypes), gender, age ( $\leq 50 / > 50$ ), BMD T-score ( $\leq -2.5 / > -2.5$ ) and bisphosphonate use at  
16 baseline or in 2 years prior to randomisation. Following randomisation, the study database will  
17 generate a treatment code which will be used by the research pharmacies in each participating centre  
18 to ensure that the correct medication is dispensed.  
19  
20  
21  
22  
23  
24

#### 25 *Pre- and post-randomisation withdrawals*

26 Participants will be advised that they have the right to withdraw from the study at any time for any  
27 reason. The investigator will have the right to withdraw a participant at any time if it is deemed to be  
28 in the participant's best interest. If a participant decides that they no longer wish to continue with  
29 routine assessments or adhere to the study protocol before the planned end of trial assessment, they  
30 will be given the opportunity to attend for the end of trial assessment. The same will apply to  
31 participants in whom the local investigator decides that adherence to the trial protocol would be  
32 inappropriate.  
33  
34  
35  
36  
37  
38

#### 39 **Statistical analysis**

40 Statistical analysis will employ the intention-to-treat principle. The main analysis of the primary  
41 outcome will summarise time to first fracture by treatment group using Kaplan-Meier survival curves,  
42 the groups being compared using the log-rank test stratified by the minimisation variables. We will  
43 review accumulation of fractures during the study and review the situation when 139 patients have  
44 suffered a clinical fracture confirmed by adjudication. This will be done by the blinded trial statistician  
45 and the TSC will then be asked to make a recommendation on continuation (or termination) of the  
46 trial. This recommendation will consider an assumption that at least 15% of participants will develop  
47 a new vertebral fracture during the study while noting that these will not be ascertained until review  
48 of spine x-rays taken at the end of study visit. A secondary analysis will use binary logistic regression,  
49 with treatment group (active vs. standard care) and the minimisation variables (fracture in last 2 years,  
50 OI clinical subtype, gender, age, BMD group and bisphosphonate use at baseline or in 2 years prior to  
51 randomisation) as the independent variables. The effect of randomised treatment will be measured  
52  
53  
54  
55  
56  
57  
58  
59  
60

1  
2  
3 by the odds ratio (and 95% confidence interval) for TPTD/ZA vs. standard care. While every effort will  
4 be made to obtain complete follow-up data on all patients, it is recognised that in the OI population  
5 some study participants will be lost to follow-up. A sensitivity analysis in which missing data are  
6 imputed will be developed according to the principles outlined in (20), namely to develop an  
7 understanding for the reasons for loss to follow-up, define the primary set of assumptions about the  
8 missing data mechanism on this basis, conduct a statistically valid analysis under these assumptions  
9 and explore the robustness of the conclusions in further sensitivity analyses that capture departures  
10 from the primary missing data assumptions.

11  
12  
13  
14  
15  
16 There will be no formal interim analysis for early stopping due to efficacy or futility.

### 17 18 *Mechanistic Study*

19  
20 The mechanistic objective will be addressed in two stages. First, descriptive statistics of fracture rate  
21 will be summarised by treatment group for clinical subtype of OI, baseline BMD, sex, molecular  
22 diagnosis and presence of baseline vertebral fractures. Formal interim analyses of the primary  
23 outcome will be performed on each of these: the primary outcome analysis (main and secondary  
24 analyses, as described above) will be repeated, with the inclusion of an interaction term between  
25 subgroup and treatment to establish if the treatment effect differs by subgroup. This will be used to  
26 evaluate the influence of clinical subtype and molecular diagnosis on clinical outcome and to inform  
27 a subsequent individual patient data meta-analysis combining the data from this trial and the TPTD  
28 and standard care groups from the trial led by co-applicant Professor Bente Langdahl which has  
29 started recruitment in Scandinavia (EudraCT 2011-002811-27) and by sourcing data from the trial  
30 previously reported by Orwoll in which TPTD was compared with placebo in patients with OI (17).  
31 These analyses will include a fixed effect for trial and will formally test, in a separate model for each  
32 baseline variable, for an interaction between the baseline variable and the effect of TPTD (versus  
33 standard care) on fracture rate. In further pooled analyses data from the standard care groups in both  
34 trials will be combined to estimate the association between each baseline variable and fracture risk in  
35 patients receiving standard care. All analyses and data manipulations will be carried out using SAS®  
36 for Windows. SAS Institute Inc. Cary, NC, U.S.A.

### 37 38 **Sample size**

39  
40 The sample size has been arrived based on analysis of previous clinical trials and observational studies  
41 of adult OI patients (5-9). From these studies, we estimated that the proportion of participants  
42 experiencing a new clinical fracture each year to be about 16% in the standard care group. There have  
43 been no prospective studies on the incidence of new vertebral fracture in adults with OI, but cross-  
44 sectional studies have reported that vertebral fractures are present in between 67% (23) to 100% (24)  
45 of individuals. We have therefore assumed that 15% of participants in the standard care group will  
46  
47  
48  
49  
50  
51  
52  
53  
54  
55  
56  
57  
58  
59  
60

1  
2  
3 experience a new vertebral fracture during follow-up which will be detected by spine x-rays that are  
4 being performed at the end of study. If active treatment reduces the proportion of patients who  
5 experience a fracture by 25%, this equates to an approximate absolute risk reduction of 16% (from  
6 64% to 48%) and a hazard ratio of 0.608. This is considered to be a clinically important difference. We  
7  
8 assume that up to 11% of participants may be lost to follow up, evenly spread throughout the duration  
9  
10 of the study. With all these assumptions, a total sample size of 350 participants (175 per group) would  
11  
12 be expected to result in 139 patients with new clinical fractures after an average duration of 62  
13  
14 months follow up and an additional 21 vertebral fractures detected by end of study spine x-rays (160  
15  
16 fractures in total). If the number of fractures is as predicted above, the study would have 88% power  
17  
18 in analysis of the primary endpoint using a 5% two-sided significance level.  
19

### 20 **Data management**

21 Data from study visits will be entered directly onto an electronic care record forms (eCRF) by staff at  
22  
23 study sites. The eCRF will be hosted by Edinburgh Clinical Trials Unit and linked to the main study  
24  
25 database. The Principal Investigator at each study site will be responsible for the quality of the data  
26  
27 recorded in the CRF. The TOPAZ study eCRF web portal and database is built and maintained by the  
28  
29 software development team of the Edinburgh Clinical Trials Unit (ECTU), following internal standard  
30  
31 operating procedures. The study database will not contain details of personal information about  
32  
33 study participants but a recruitment log will be held locally in order to communicate with  
34  
35 participants about study visits and adverse events. Confidentiality will be maintained before during  
36  
37 and after completion of the trial. Following completion of the study and analysis of the results  
38  
39 investigators will be given access to the final trial dataset.

### 40 **Adverse event management**

41 At each study visit participants will be asked about primary care visits for health-related problems,  
42  
43 medications taken, hospitalisations and any other adverse effects. In the event of hospitalisation, the  
44  
45 patient will be asked to contact the Principal Investigator (PI) at their local study centre. Adverse  
46  
47 events (AE), serious adverse events (SAE) and suspected unexpected serious adverse reactions  
48  
49 (SUSAR) will be collected continuously throughout the trial. In addition, participants will be contacted  
50  
51 by local research teams one week after receipt of the infusion to record symptoms or side-effects  
52  
53 related to this intervention. All adverse events will be recorded from the time a participant consents  
54  
55 to join the study until the last study visit has been completed. The investigator or a delegated member  
56  
57 of the study team will record adverse events at every visit and participants will be instructed to contact  
58  
59 the investigator at any time if adverse events develop. If an AE/SAE occurs, it is the responsibility of  
60  
61 the investigator to review all documentation related to the event and evaluate seriousness, causality,  
62  
63 severity and expectedness. Events that are considered serious, possibly, probably or definitely related

1  
2  
3 to the IMP (serious adverse reactions, SAR) and unexpected (SUSAR) may be unblinded if it is  
4 necessary for clinical care. Once the investigator becomes aware that an SAE has occurred, they must  
5 report the information to the Clinical Research Governance & quality assurance office of the sponsor  
6 within 24 hours. The investigator will then be required to complete a Serious Adverse Event (SAE) form  
7 to assess causality, seriousness, severity and expectedness of the event.  
8  
9

### 11 **Trial oversight**

12 The trial is sponsored by the academic and clinical central office for research and development  
13 (ACCORD) which is a partnership between the University of Edinburgh and NHS Lothian Health  
14 Board. The study sponsor has insurance in place to compensate participants who suffer harm from  
15 trial participation. The sponsor had no role in in study design, data collection, management, analysis,  
16 interpretation, writing of the report or the decision to submit the report for publication. Monitoring  
17 of the study is being performed in accordance with a study monitoring plan developed by the  
18 sponsor. The Principal Investigators and institutions involved in the study have agreed to allow trial  
19 related monitoring, audits, Research Ethics Committee review, and regulatory inspection(s).  
20 Protocol amendments will be communicated to study centres, Research Ethics Committees, and  
21 Medicines Regulatory Authorities, according to standard procedures. A Trial Steering Committee  
22 (TSC) has been established to oversee the conduct and progress of the trial, chaired by Professor  
23 Philip Conaghan (University of Leeds), Members are SHR, CJW, JW, Prof Sarah Brown (University of  
24 Leeds), Dr Osten Ljungren (University Uppsala, Ms Coreen Kelday (Brittle Bone Society), Mr Eero  
25 Nevalainen (Patient representative and vice Chair OIFE). An independent Data Monitoring  
26 Committee chaired by Professor Anthony Woolf has been established to oversee the safety of  
27 subjects in the trial. Members are Dr Willem Lems (Amsterdam), Dr Susie Cro (Imperial College  
28 London), and CK (unblinded statistician).  
29  
30  
31  
32  
33  
34  
35  
36  
37  
38  
39  
40  
41

### 42 **Trial status**

43 At the time of submission of this paper, recruitment to the trial has closed and the target number of  
44 350 participants were enrolled at 25 sites in 6 European countries. Participants are currently under  
45 follow-up. The trial is expected to report in April 2025  
46  
47

### 48 **Patient and public involvement**

49 The study was designed with the involvement of patients with OI. The trial has received non-  
50 financial support from the Brittle Bone Society (BBS) - a patient support group based in the UK and  
51 by the Osteogenesis Imperfecta Federation Europe (OIFE).  
52  
53  
54

### 55 **Ethical Approval and Dissemination**

1  
2  
3 Ethical approval was granted by the East of Scotland Research Ethics Service (reference number  
4 16/ES/0110). The study was also approved by local research ethics committees of all participating  
5 centres outside the UK and the medicines regulatory agencies in all participating countries.  
6  
7

8 The results of the study will be presented in abstract form at academic meetings and will be  
9 submitted to a peer-reviewed journal so that the results are disseminated to the wider medical  
10 community. The results will also be disseminated to patients with OI and their families through the  
11 website of the Brittle Bone Society. Authorship on the main paper will be determined by the  
12 International Committee of Medical Journal Editors (ICMJE) guidelines. The results of the TOPAZ trial  
13 are expected to inform clinical practice and influence clinical guidelines for the management of  
14 osteogenesis imperfecta by determining if intervention with anabolic therapy in the form of TPTD  
15 followed by ZA can reduce the risk of clinical fractures in adults with OI.  
16  
17  
18  
19  
20

#### 21 **Data Statement**

22  
23 The datasets generated and analysed during this clinical trial are not yet publicly available since data  
24 collection is incomplete. It is anticipated that an anonymised dataset will be made available for  
25 sharing following completion of the study, database lock and analysis of the primary data.  
26  
27

#### 28 **Funding**

29  
30 The study was funded by the Efficacy and Mechanism Evaluation (EME) Programme (reference EME  
31 14/200/18) which is a partnership between the UK Medical Research Council (MRC) and the National  
32 Institute of Health Research. The teriparatide was kindly donated by Eli Lilly Pharmaceuticals. The  
33 funder and Eli Lilly had no role in in study design, data collection, management, analysis,  
34 interpretation, writing of the report or and the decision to submit the report for publication. For the  
35 purpose of open access, the author has applied a Creative Commons Attribution (CC BY) licence to  
36 any Author Accepted Manuscript version arising from this submission.  
37  
38  
39  
40

#### 41 **Author Statement**

42  
43 First draft of the manuscript: JH & SHR; Study concept and design: SHR; Obtaining funding: LF, KG  
44 and SHR; Development of statistical analysis plan and sample size calculations: CJW and CK;  
45 Participant recruitment and study assessments: BL, MKJ, JW, BL, SHR Supervision of conduct of the  
46 trial: SHR. All authors commented on and revised the manuscript for intellectual content and  
47 approved the final version of the manuscript which is based on version 10 of the study protocol  
48 October 10<sup>th</sup> 2022.  
49  
50  
51

#### 52 **Conflicts of Interest**

53  
54 All authors report funding from the Efficacy and Mechanism Evaluation programme of the NIHR and  
55 non-financial support from Eli Lilly to support this work. Professor Langdahl reports research grants  
56 from Mereo Pharmaceuticals outside this work and consultancy funding from Amgen, UCB, and  
57  
58  
59  
60

1  
2  
3 Gedeon Richter. Ms Patricia Osborne reports that she is an employee of the Brittle Bone Society.  
4 Professor Ralston reports research grants from Kyowa Kirin and Astra-Zeneca outside the submitted  
5 work and funding to his institution from Pfizer, Abbvie, Kyowa Kirin, Alexion, Amgen, Cellgene,  
6 Janssen-Cilag, Novartis, Eli Lilly, Thornton & Ross, and Sanofi Genzyme and UCB outside the  
7 submitted work. Professor Ralston also reports that he is a member of the Scientific Advisory Board  
8 of the Brittle Bone Society. Dr MK Javaid reports consultancy funding from Amgen outside the  
9 submitted work and reports that he is chair of the Medical Advisory Board of the Brittle Bone  
10 Society. Dr Walsh reports that she is a member of the Medical Advisory Board of the Brittle Bone  
11 Society. Dr Keerie and Professor Weir have no other conflicts of interest to declare.

### 12 **Consent for publication**

13 The manuscript does not contain individual patient data.

### 14 **Competing Interests**

15 The authors declare that they have no competing interests.

### 16 **ACKNOWLEDGEMENTS:**

17 The authors wish to acknowledge the valuable support of the Brittle Bone Society and OIFE in  
18 publicising and supporting the study and the many patients with OI who volunteered to take part.

19 The authors also wish to acknowledge the contribution of Dr David Moore and colleagues from the  
20 NHS Molecular Genetics Laboratory in Edinburgh for the genetic testing, Ms Lynsey Milne from ECTU  
21 for data management support.

### 22 **Good clinical practice**

23 The study will be carried out according to the principles of the International Conference on  
24 Harmonisation Tripartite Guideline for Good Clinical Practice and local guidance and regulations.

### 25 **Consolidated standards of reporting trials**

26 The results of the trial will be reported in accordance with the Consolidated Standards Of Reporting  
27 Trials (CONSORT) (25).  
28  
29  
30  
31  
32  
33  
34  
35  
36  
37  
38  
39  
40  
41  
42  
43  
44  
45  
46  
47  
48  
49  
50  
51  
52  
53  
54  
55  
56  
57  
58  
59  
60



1  
2  
3  
4  
5  
6  
7  
8  
9  
10  
11  
12  
13  
14  
15  
16  
17  
18  
19  
20  
21  
22  
23  
24  
25  
26  
27  
28  
29  
30  
31  
32  
33  
34  
35  
36  
37  
38  
39  
40  
41  
42  
43  
44  
45  
46

**Figure 1. Overview of study design**

For peer review only

**Table 1. Eligibility and exclusion criteria for the TOPAZ trial**

|                                                                     |
|---------------------------------------------------------------------|
| <i>Eligibility criteria</i>                                         |
| Clinical diagnosis of osteogenesis imperfecta                       |
| Aged 18 years or over                                               |
| <i>Exclusion criteria</i>                                           |
| Unwilling or unable to provide informed consent                     |
| Contraindication to zoledronic acid                                 |
| Contraindication to teriparatide                                    |
| Estimated GFR (eGFR) < 35ml/min                                     |
| Already taking part in another randomised controlled clinical trial |
| Pregnancy or lactation at the time of randomisation                 |

**Table 2. Schedule of assessments**

|                                            | Baseline visit | <i>Additional safety bloods for participants &lt;30kg only</i> |       |        | 4-monthly TPTD -supply | 6 monthly telephone contact | 12-month visit | 24-month visit | 6 monthly telephone contact | End of Study Visit |
|--------------------------------------------|----------------|----------------------------------------------------------------|-------|--------|------------------------|-----------------------------|----------------|----------------|-----------------------------|--------------------|
|                                            |                | 2 Wk.                                                          | 4 Wk. | 12 Wk. |                        |                             |                |                |                             |                    |
| Informed consent                           | X              |                                                                |       |        |                        |                             |                |                |                             |                    |
| Inclusion/exclusion                        | X              |                                                                |       |        |                        |                             |                |                |                             |                    |
| Demographic data                           | X              |                                                                |       |        |                        |                             |                |                |                             |                    |
| Medical history                            | X              |                                                                |       |        |                        |                             |                |                |                             |                    |
| Clinical exam                              | X              |                                                                |       |        |                        |                             | X              | X              |                             | X                  |
| DEXA                                       | X <sup>1</sup> |                                                                |       |        |                        |                             |                | X              |                             | X <sup>1</sup>     |
| Spine x-ray                                | X              |                                                                |       |        |                        |                             |                |                |                             | X                  |
| HRQCT                                      | X <sup>1</sup> |                                                                |       |        |                        |                             | X              | X              |                             | X <sup>1</sup>     |
| Safety bloods                              | X              | X                                                              | X     | X      |                        |                             | X              | X              |                             | X                  |
| Sample for genetic analysis                | X              |                                                                |       |        |                        |                             |                |                |                             |                    |
| Biochemical markers                        | X              |                                                                |       |        |                        |                             | X              | X              |                             | X                  |
| Pregnancy test                             | X              |                                                                |       |        |                        |                             |                | X              |                             |                    |
| Participant Questionnaire Pack             | X              |                                                                |       |        |                        |                             | X              | X              |                             | X                  |
| Training on treatment                      | X              |                                                                |       |        |                        |                             |                |                |                             |                    |
| Treatment diary issue                      | X              |                                                                |       |        |                        |                             |                |                |                             |                    |
| Diary data entry                           |                |                                                                |       |        | X                      | X                           | X              | X              | X                           | X                  |
| TPTD accountability                        |                |                                                                |       |        | X                      | X                           | X              | X              |                             |                    |
| Adverse events                             |                |                                                                |       |        | X                      | X                           | X              | X              | X                           | X                  |
| Medications check                          |                |                                                                |       |        | X                      | X                           | X              | X              | X                           | X                  |
| ZA infusion                                |                |                                                                |       |        |                        |                             |                | X              |                             |                    |
| X-rays for incident fractures <sup>2</sup> |                |                                                                |       |        |                        | X                           | X              | X              | X                           | X                  |

<sup>1</sup>. Not required for participants who have had a 24-month visit DEXA scan or HRQCT scan within 3 months of the end of trial visit. <sup>2</sup> x-rays may be taken at any point throughout the trial when participants report the occurrence of possible incident fractures

**Table 3. Summary of primary and secondary objectives**

|                                                                                                                                                                                                                                                                                                                                                                                                                                                                                                                                                                                                                                                                                                                                                                                                                                                                                                                                                                                                                                           |
|-------------------------------------------------------------------------------------------------------------------------------------------------------------------------------------------------------------------------------------------------------------------------------------------------------------------------------------------------------------------------------------------------------------------------------------------------------------------------------------------------------------------------------------------------------------------------------------------------------------------------------------------------------------------------------------------------------------------------------------------------------------------------------------------------------------------------------------------------------------------------------------------------------------------------------------------------------------------------------------------------------------------------------------------|
| <b>Primary Objective</b>                                                                                                                                                                                                                                                                                                                                                                                                                                                                                                                                                                                                                                                                                                                                                                                                                                                                                                                                                                                                                  |
| To determine if TPTD/ZA: <ul style="list-style-type: none"> <li>• Reduces the total number of clinical fractures in adults with osteogenesis imperfecta compared with standard care</li> </ul>                                                                                                                                                                                                                                                                                                                                                                                                                                                                                                                                                                                                                                                                                                                                                                                                                                            |
| <b>Secondary objectives</b>                                                                                                                                                                                                                                                                                                                                                                                                                                                                                                                                                                                                                                                                                                                                                                                                                                                                                                                                                                                                               |
| To determine if TPTD/ZA: <ul style="list-style-type: none"> <li>• Reduces the number of incident vertebral fractures assessed by imaging of the thoracic and lumbar spine.</li> <li>• Reduces the total number of fractures experienced by participants defined as the combination validated clinical fractures and vertebral fractures and fractures reported by participants, where imaging was not performed, not feasible or where the results were inconclusive.</li> <li>• Increases BMD as compared with standard care.</li> <li>• Reduces the number of patient-reported fractures</li> <li>• Influences bone pain assessed by the brief pain inventory (BPI)</li> <li>• Influences quality of life as assessed by the SF36 questionnaire;</li> <li>• Influences sleep quality assessed by the PSQI questionnaire</li> <li>• Influences functional status as assessed by the health assessment questionnaire (HAQ) and EuroQoL5D (EQ5D) assessment tools</li> <li>• Influences biochemical markers of bone remodelling</li> </ul> |

**References:**

1. Sillence DO, Senn A, Danks DM. Genetic heterogeneity in osteogenesis imperfecta. *J Med Genet.* 1979;16(2):101-16.
2. Forlino A, Marini JC. Osteogenesis imperfecta. *Lancet.* 2016;387(10028):1657-71.
3. Wekre LL, Eriksen EF, Falch JA. Bone mass, bone markers and prevalence of fractures in adults with osteogenesis imperfecta. *Arch Osteoporos.* 2011;6:31-8.
4. Rauch F, Travers R, Parfitt AM, Glorieux FH. Static and dynamic bone histomorphometry in children with osteogenesis imperfecta. *Bone.* 2000;26(6):581-9.
5. Braga V, Gatti D, Rossini M, Colapietro F, Battaglia E, Viapiana O, et al. Bone turnover markers in patients with osteogenesis imperfecta. *Bone.* 2004;34(6):1013-6.
6. Boyde A, Travers R, Glorieux FH, Jones SJ. The mineralization density of iliac crest bone from children with osteogenesis imperfecta. *Calcif Tissue Int.* 1999;64(3):185-90.
7. Fratzi-Zelman N, Morello R, Lee B, Rauch F, Glorieux FH, Misof BM, et al. CRTAP deficiency leads to abnormally high bone matrix mineralization in a murine model and in children with osteogenesis imperfecta type VII. *Bone.* 2010;46(3):820-6.
8. Roschger P, Fratzi-Zelman N, Misof BM, Glorieux FH, Klaushofer K, Rauch F. Evidence that abnormal high bone mineralization in growing children with osteogenesis imperfecta is not associated with specific collagen mutations. *Calcif Tissue Int.* 2008;82(4):263-70.
9. Fratzi-Zelman N, Schmidt I, Roschger P, Glorieux FH, Klaushofer K, Fratzi P, et al. Mineral particle size in children with osteogenesis imperfecta type I is not increased independently of specific collagen mutations. *Bone.* 2014;60:122-8.
10. Fratzi-Zelman N, Barnes AM, Weis M, Carter E, Hefferan TE, Perino G, et al. Non-Lethal Type VIII Osteogenesis Imperfecta Has Elevated Bone Matrix Mineralization. *J Clin Endocrinol Metab.* 2016;101(9):3516-25.

- 1  
2  
3 11. Fratzl-Zelman N, Schmidt I, Roschger P, Roschger A, Glorieux FH, Klaushofer K, et al. Unique  
4 micro- and nano-scale mineralization pattern of human osteogenesis imperfecta type VI bone. *Bone*.  
5 2015;73:233-41.  
6  
7
- 8  
9 12. Dwan K, Phillipi CA, Steiner RD, Basel D. Bisphosphonate therapy for osteogenesis  
10 imperfecta. *Cochrane Database Syst Rev*. 2016;10:CD005088.  
11  
12
- 13 13. Dwan K, Phillipi CA, Steiner RD, Basel D. Bisphosphonate therapy for osteogenesis  
14 imperfecta. *Cochrane Database Syst Rev*. 2014(7):CD005088.  
15  
16
- 17 14. Phillipi CA, Remington T, Steiner RD. Bisphosphonate therapy for osteogenesis imperfecta.  
18 *Cochrane Database Syst Rev*. 2008(4):CD005088.  
19  
20
- 21 15. Hald JD, Evangelou E, Langdahl BL, Ralston SH. Bisphosphonates for the prevention of  
22 fractures in osteogenesis imperfecta: meta-analysis of placebo-controlled trials. *J Bone Miner Res*.  
23 2015;30(5):929-33.  
24  
25
- 26 16. Boivin GY, Chavassieux PM, Santora AC, Yates J, Meunier PJ. Alendronate increases bone  
27 strength by increasing the mean degree of mineralization of bone tissue in osteoporotic women.  
28 *Bone*. 2000;27(5):687-94.  
29  
30
- 31 17. Orwoll ES, Shapiro J, Veith S, Wang Y, Lapidus J, Vanek C, et al. Evaluation of teriparatide  
32 treatment in adults with osteogenesis imperfecta. *J Clin Invest*. 2014;124(2):491-8.  
33  
34
- 35 18. Ware JE, Jr., Gandek B. Overview of the SF-36 Health Survey and the International Quality of  
36 Life Assessment (IQOLA) Project. *J Clin Epidemiol*. 1998;51(11):903-12.  
37  
38
- 39 19. Bruce B, Fries JF. The Stanford Health Assessment Questionnaire: a review of its history,  
40 issues, progress, and documentation. *J Rheumatol*. 2003;30(1):167-78.  
41  
42
- 43 20. Rabin R, de Charro F. EQ-5D: a measure of health status from the EuroQol Group. *Ann Med*.  
44 2001;33(5):337-43.  
45  
46
- 47 21. Atkinson TM, Mendoza TR, Sit L, Passik S, Scher HI, Cleeland C, et al. The Brief Pain Inventory  
48 and its "pain at its worst in the last 24 hours" item: clinical trial endpoint considerations. *Pain Med*.  
49 2010;11(3):337-46.  
50  
51  
52  
53  
54  
55  
56  
57  
58  
59  
60

- 1  
2  
3 22. Buysse DJ, Reynolds CF, 3rd, Monk TH, Berman SR, Kupfer DJ. The Pittsburgh Sleep Quality  
4 Index: a new instrument for psychiatric practice and research. *Psychiatry Res.* 1989;28(2):193-213.  
5  
6  
7  
8 23. Wekre LL, Kjensli A, Aasand K, Falch JA, Eriksen EF. Spinal deformities and lung function in  
9 adults with osteogenesis imperfecta. *Clin Respir J.* 2014;8(4):437-43.  
10  
11  
12  
13 24. Adami S, Gatti D, Colapietro F, Fracassi E, Braga V, Rossini M, et al. Intravenous neridronate  
14 in adults with osteogenesis imperfecta. *J Bone Miner Res.* 2003;18(1):126-30.  
15  
16  
17  
18 25. Schulz KF, Altman DG, Moher D, Group C. CONSORT 2010 Statement: updated guidelines for  
19 reporting parallel group randomised trials. *Trials.* 2010;11:32.  
20  
21  
22  
23  
24  
25  
26  
27  
28  
29  
30  
31  
32  
33  
34  
35  
36  
37  
38  
39  
40  
41  
42  
43  
44  
45  
46  
47  
48  
49  
50  
51  
52  
53  
54  
55  
56  
57  
58  
59  
60

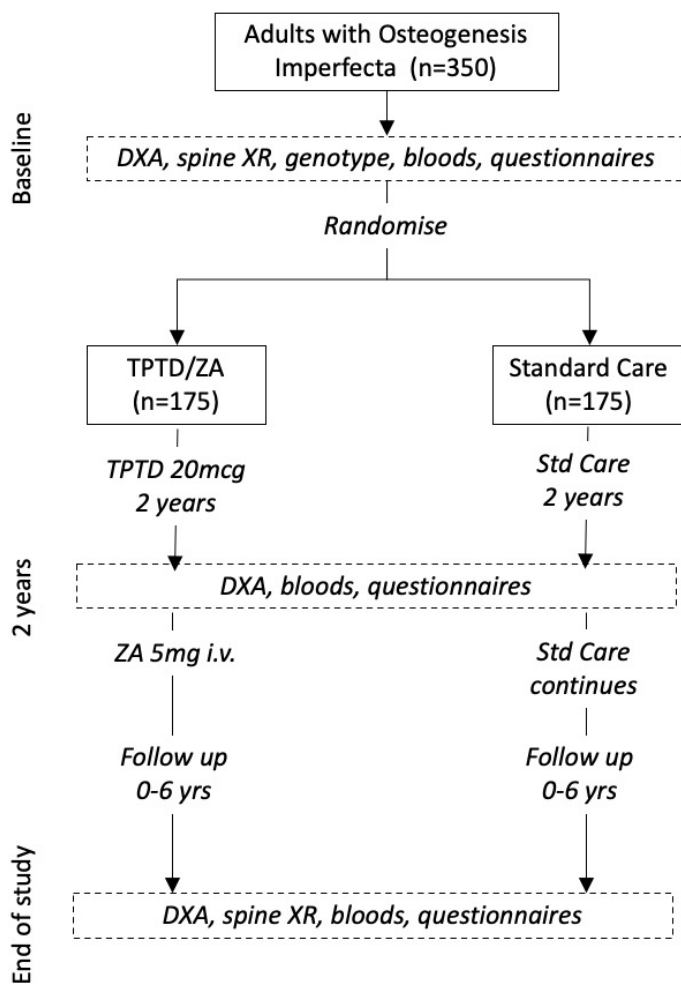

Figure 1. Overview of study design

190x275mm (96 x 96 DPI)



1  
2 **SPIRIT-Outcomes 2022 Checklist (for combined completion of SPIRIT 2013 and SPIRIT-**  
3 **Outcomes 2022 items)<sup>a</sup>**  
4

| Section                           | Item No. | SPIRIT 2013 Item                                                                                                                                                                                                                                                                         | SPIRIT-Outcomes 2022 item | Location Reported <sup>b</sup> |
|-----------------------------------|----------|------------------------------------------------------------------------------------------------------------------------------------------------------------------------------------------------------------------------------------------------------------------------------------------|---------------------------|--------------------------------|
| <b>Administrative information</b> |          |                                                                                                                                                                                                                                                                                          |                           |                                |
| Title                             | 1        | Descriptive title identifying the study design, population, interventions, and, if applicable, trial acronym                                                                                                                                                                             | -                         |                                |
| Trial registration                | 2a       | Trial identifier and registry name. If not yet registered, name of intended registry                                                                                                                                                                                                     | -                         |                                |
|                                   | 2b       | All items from the World Health Organization Trial Registration Data Set                                                                                                                                                                                                                 | -                         |                                |
| Protocol version                  | 3        | Date and version identifier                                                                                                                                                                                                                                                              | -                         |                                |
| Funding                           | 4        | Sources and types of financial, material, and other support                                                                                                                                                                                                                              | -                         |                                |
| Roles and responsibilities        | 5a       | Names, affiliations, and roles of protocol contributors                                                                                                                                                                                                                                  | -                         |                                |
|                                   | 5b       | Name and contact information for the trial sponsor                                                                                                                                                                                                                                       | -                         |                                |
|                                   | 5c       | Role of study sponsor and funders, if any, in study design; collection, management, analysis, and interpretation of data; writing of the report; and the decision to submit the report for publication, including whether they will have ultimate authority over any of these activities | -                         |                                |
|                                   | 5d       | Composition, roles, and responsibilities of the coordinating centre, steering committee, endpoint adjudication committee, data management team, and other individuals or groups overseeing the trial, if applicable (see Item 21a for data monitoring committee)                         | -                         |                                |
| <b>Introduction</b>               |          |                                                                                                                                                                                                                                                                                          |                           |                                |
| Background and rationale          | 6a       | Description of research question and justification for undertaking the trial, including summary of relevant studies (published and unpublished) examining benefits and harms for each intervention                                                                                       | -                         |                                |
|                                   | 6b       | Explanation for choice of comparators                                                                                                                                                                                                                                                    | -                         |                                |
| Objectives                        | 7        | Specific objectives or hypotheses                                                                                                                                                                                                                                                        | -                         |                                |

| Section                                                   | Item No. | SPIRIT 2013 Item                                                                                                                                                                                                                                                                                                                                                               | SPIRIT-Outcomes 2022 item | Location Reported <sup>b</sup> |
|-----------------------------------------------------------|----------|--------------------------------------------------------------------------------------------------------------------------------------------------------------------------------------------------------------------------------------------------------------------------------------------------------------------------------------------------------------------------------|---------------------------|--------------------------------|
| Trial design                                              | 8        | Description of trial design including type of trial (eg, parallel group, crossover, factorial, single group), allocation ratio, and framework (eg, superiority, equivalence, noninferiority, exploratory)                                                                                                                                                                      | -                         |                                |
| <b>Methods: Participants, interventions, and outcomes</b> |          |                                                                                                                                                                                                                                                                                                                                                                                |                           |                                |
| Study setting                                             | 9        | Description of study settings (eg, community clinic, academic hospital) and list of countries where data will be collected. Reference to where list of study sites can be obtained                                                                                                                                                                                             | -                         |                                |
| Eligibility criteria                                      | 10       | Inclusion and exclusion criteria for participants. If applicable, eligibility criteria for study centres and individuals who will perform the interventions (eg, surgeons, psychotherapists)                                                                                                                                                                                   | -                         |                                |
| Interventions                                             | 11a      | Interventions for each group with sufficient detail to allow replication, including how and when they will be administered (for specific guidance see TIDieR checklist and guide)                                                                                                                                                                                              | -                         |                                |
|                                                           | 11b      | Criteria for discontinuing or modifying allocated interventions for a given trial participant (eg, drug dose change in response to harms, participant request, or improving/worsening disease)                                                                                                                                                                                 | -                         |                                |
|                                                           | 11c      | Strategies to improve adherence to intervention protocols, and any procedures for monitoring adherence (eg, drug tablet return, laboratory tests)                                                                                                                                                                                                                              | -                         |                                |
|                                                           | 11d      | Relevant concomitant care and interventions that are permitted or prohibited during the trial                                                                                                                                                                                                                                                                                  | -                         |                                |
| Outcomes                                                  | 12       | Primary, secondary, and other outcomes, including the specific measurement variable (eg, systolic blood pressure), analysis metric (eg, change from baseline, final value, time to event), method of aggregation (eg, median, proportion), and time point for each outcome. Explanation of the clinical relevance of chosen efficacy and harm outcomes is strongly recommended | -                         |                                |

| Section                                                             | Item No. | SPIRIT 2013 Item                                                                                                                                                                                                                                                                                                                                         | SPIRIT-Outcomes 2022 item                                                                                                                           | Location Reported <sup>b</sup> |
|---------------------------------------------------------------------|----------|----------------------------------------------------------------------------------------------------------------------------------------------------------------------------------------------------------------------------------------------------------------------------------------------------------------------------------------------------------|-----------------------------------------------------------------------------------------------------------------------------------------------------|--------------------------------|
|                                                                     | 12.1     |                                                                                                                                                                                                                                                                                                                                                          | Provide a rationale for the selection of the domain for the trial's primary outcome                                                                 |                                |
|                                                                     | 12.2     |                                                                                                                                                                                                                                                                                                                                                          | If the analysis metric for the primary outcome represents within-participant change, define and justify the minimal important change in individuals |                                |
|                                                                     | 12.3     |                                                                                                                                                                                                                                                                                                                                                          | If the outcome data collected are continuous but will be analyzed as categorical (method of aggregation), specify the cutoff values to be used      |                                |
|                                                                     | 12.4     |                                                                                                                                                                                                                                                                                                                                                          | If outcome assessments will be performed at several time points after randomization, state the time points that will be used for analysis           |                                |
|                                                                     | 12.5     |                                                                                                                                                                                                                                                                                                                                                          | If a composite outcome is used, define all individual components of the composite outcome                                                           |                                |
| Participant timeline                                                | 13       | Time schedule of enrolment, interventions (including any run-ins and washouts), assessments, and visits for participants. A schematic diagram is highly recommended (see Figure)                                                                                                                                                                         | -                                                                                                                                                   |                                |
| Sample size                                                         | 14       | Estimated number of participants needed to achieve study objectives and how it was determined, including clinical and statistical assumptions supporting any sample size calculations                                                                                                                                                                    | -                                                                                                                                                   |                                |
|                                                                     | 14.1     |                                                                                                                                                                                                                                                                                                                                                          | Define and justify the target difference between treatment groups (eg, the minimal important difference)                                            |                                |
| Recruitment                                                         | 15       | Strategies for achieving adequate participant enrolment to reach target sample size                                                                                                                                                                                                                                                                      | -                                                                                                                                                   |                                |
| <b>Methods: Assignment of interventions (for controlled trials)</b> |          |                                                                                                                                                                                                                                                                                                                                                          |                                                                                                                                                     |                                |
| Allocation:                                                         |          |                                                                                                                                                                                                                                                                                                                                                          |                                                                                                                                                     |                                |
| Sequence generation                                                 | 16a      | Method of generating the allocation sequence (eg, computer-generated random numbers), and list of any factors for stratification. To reduce predictability of a random sequence, details of any planned restriction (eg, blocking) should be provided in a separate document that is unavailable to those who enrol participants or assign interventions | -                                                                                                                                                   |                                |

| Section                                                   | Item No. | SPIRIT 2013 Item                                                                                                                                                                                                                                                                                                                                                                                             | SPIRIT-Outcomes 2022 item                                                                                            | Location Reported <sup>b</sup> |
|-----------------------------------------------------------|----------|--------------------------------------------------------------------------------------------------------------------------------------------------------------------------------------------------------------------------------------------------------------------------------------------------------------------------------------------------------------------------------------------------------------|----------------------------------------------------------------------------------------------------------------------|--------------------------------|
| Allocation concealment mechanism                          | 16b      | Mechanism of implementing the allocation sequence (eg, central telephone; sequentially numbered, opaque, sealed envelopes), describing any steps to conceal the sequence until interventions are assigned                                                                                                                                                                                                    | -                                                                                                                    |                                |
| Implementation                                            | 16c      | Who will generate the allocation sequence, who will enrol participants, and who will assign participants to interventions                                                                                                                                                                                                                                                                                    | -                                                                                                                    |                                |
| Blinding (masking)                                        | 17a      | Who will be blinded after assignment to interventions (eg, trial participants, care providers, outcome assessors, data analysts), and how                                                                                                                                                                                                                                                                    | -                                                                                                                    |                                |
|                                                           | 17b      | If blinded, circumstances under which unblinding is permissible, and procedure for revealing a participant's allocated intervention during the trial                                                                                                                                                                                                                                                         | -                                                                                                                    |                                |
| <b>Methods: Data collection, management, and analysis</b> |          |                                                                                                                                                                                                                                                                                                                                                                                                              |                                                                                                                      |                                |
| Data collection methods                                   | 18a      | Plans for assessment and collection of outcome, baseline, and other trial data, including any related processes to promote data quality (eg, duplicate measurements, training of assessors) and a description of study instruments (eg, questionnaires, laboratory tests) along with their reliability and validity, if known. Reference to where data collection forms can be found, if not in the protocol | -                                                                                                                    |                                |
|                                                           | 18a.1    |                                                                                                                                                                                                                                                                                                                                                                                                              | Describe what is known about the responsiveness of the study instruments in a population similar to the study sample |                                |
|                                                           | 18a.2    |                                                                                                                                                                                                                                                                                                                                                                                                              | Describe who will assess the outcome (eg, nurse, parent)                                                             |                                |
|                                                           | 18b      | Plans to promote participant retention and complete follow-up, including list of any outcome data to be collected for participants who discontinue or deviate from intervention protocols                                                                                                                                                                                                                    | -                                                                                                                    |                                |

| Section                    | Item No. | SPIRIT 2013 Item                                                                                                                                                                                                                                                                                                                      | SPIRIT-Outcomes 2022 item                                                                                                                                                                                                                    | Location Reported <sup>b</sup> |
|----------------------------|----------|---------------------------------------------------------------------------------------------------------------------------------------------------------------------------------------------------------------------------------------------------------------------------------------------------------------------------------------|----------------------------------------------------------------------------------------------------------------------------------------------------------------------------------------------------------------------------------------------|--------------------------------|
| Data management            | 19       | Plans for data entry, coding, security, and storage, including any related processes to promote data quality (eg, double data entry; range checks for data values). Reference to where details of data management procedures can be found, if not in the protocol                                                                     | -                                                                                                                                                                                                                                            |                                |
| Statistical methods        | 20a      | Statistical methods for analysing primary and secondary outcomes. Reference to where other details of the statistical analysis plan can be found, if not in the protocol                                                                                                                                                              | -                                                                                                                                                                                                                                            |                                |
|                            | 20a.1    |                                                                                                                                                                                                                                                                                                                                       | Describe any planned methods to account for multiplicity in the analysis or interpretation of the primary and secondary outcomes (eg, coprimary outcomes, same outcome assessed at multiple time points, or subgroup analyses of an outcome) |                                |
|                            | 20b      | Methods for any additional analyses (eg, subgroup and adjusted analyses)                                                                                                                                                                                                                                                              | -                                                                                                                                                                                                                                            |                                |
|                            | 20c      | Definition of analysis population relating to protocol non-adherence (eg, as randomised analysis), and any statistical methods to handle missing data (eg, multiple imputation)                                                                                                                                                       | -                                                                                                                                                                                                                                            |                                |
| <b>Methods: Monitoring</b> |          |                                                                                                                                                                                                                                                                                                                                       |                                                                                                                                                                                                                                              |                                |
| Data monitoring            | 21a      | Composition of data monitoring committee (DMC); summary of its role and reporting structure; statement of whether it is independent from the sponsor and competing interests; and reference to where further details about its charter can be found, if not in the protocol. Alternatively, an explanation of why a DMC is not needed | -                                                                                                                                                                                                                                            |                                |
|                            | 21b      | Description of any interim analyses and stopping guidelines, including who will have access to these interim results and make the final decision to terminate the trial                                                                                                                                                               | -                                                                                                                                                                                                                                            |                                |
| Harms                      | 22       | Plans for collecting, assessing, reporting, and managing solicited and spontaneously reported adverse events and other unintended effects of trial interventions or trial conduct                                                                                                                                                     | -                                                                                                                                                                                                                                            |                                |

| Section                         | Item No. | SPIRIT 2013 Item                                                                                                                                                                                                                                                                    | SPIRIT-Outcomes 2022 item | Location Reported <sup>b</sup> |
|---------------------------------|----------|-------------------------------------------------------------------------------------------------------------------------------------------------------------------------------------------------------------------------------------------------------------------------------------|---------------------------|--------------------------------|
| Auditing                        | 23       | Frequency and procedures for auditing trial conduct, if any, and whether the process will be independent from investigators and the sponsor                                                                                                                                         | -                         |                                |
| <b>Ethics and dissemination</b> |          |                                                                                                                                                                                                                                                                                     |                           |                                |
| Research ethics approval        | 24       | Plans for seeking research ethics committee/institutional review board (REC/IRB) approval                                                                                                                                                                                           | -                         |                                |
| Protocol amendments             | 25       | Plans for communicating important protocol modifications (eg, changes to eligibility criteria, outcomes, analyses) to relevant parties (eg, investigators, REC/IRBs, trial participants, trial registries, journals, regulators)                                                    | -                         |                                |
| Consent or assent               | 26a      | Who will obtain informed consent or assent from potential trial participants or authorised surrogates, and how (see Item 32)                                                                                                                                                        | -                         |                                |
|                                 | 26b      | Additional consent provisions for collection and use of participant data and biological specimens in ancillary studies, if applicable                                                                                                                                               | -                         |                                |
| Confidentiality                 | 27       | How personal information about potential and enrolled participants will be collected, shared, and maintained in order to protect confidentiality before, during, and after the trial                                                                                                | -                         |                                |
| Declaration of interests        | 28       | Financial and other competing interests for principal investigators for the overall trial and each study site                                                                                                                                                                       | -                         |                                |
| Access to data                  | 29       | Statement of who will have access to the final trial dataset, and disclosure of contractual agreements that limit such access for investigators                                                                                                                                     | -                         |                                |
| Ancillary and post-trial care   | 30       | Provisions, if any, for ancillary and post-trial care, and for compensation to those who suffer harm from trial participation                                                                                                                                                       | -                         |                                |
| Dissemination policy            | 31a      | Plans for investigators and sponsor to communicate trial results to participants, healthcare professionals, the public, and other relevant groups (eg, via publication, reporting in results databases, or other data sharing arrangements), including any publication restrictions | -                         |                                |
|                                 | 31b      | Authorship eligibility guidelines and any intended use of professional writers                                                                                                                                                                                                      | -                         |                                |

| Section                    | Item No. | SPIRIT 2013 Item                                                                                                                                                                               | SPIRIT-Outcomes 2022 item | Location Reported <sup>b</sup> |
|----------------------------|----------|------------------------------------------------------------------------------------------------------------------------------------------------------------------------------------------------|---------------------------|--------------------------------|
|                            | 31c      | Plans, if any, for granting public access to the full protocol, participant-level dataset, and statistical code                                                                                | -                         |                                |
| <b>Appendices</b>          |          |                                                                                                                                                                                                |                           |                                |
| Informed consent materials | 32       | Model consent form and other related documentation given to participants and authorised surrogates                                                                                             | -                         |                                |
| Biological specimens       | 33       | Plans for collection, laboratory evaluation, and storage of biological specimens for genetic or molecular analysis in the current trial and for future use in ancillary studies, if applicable | -                         |                                |

<sup>a</sup>It is strongly recommended that this checklist be read in conjunction with the SPIRIT (Standard Protocol Items: Recommendations for Interventional Trials) Statement paper for important clarification on the items. Amendments to the protocol should be tracked and dated. The SPIRIT checklist is copyrighted by the SPIRIT Group under the Creative Commons "Attribution-NonCommercial-NoDerivs 3.0 Unported" license and is reproduced with permission.

<sup>b</sup>Indicates page numbers and/or manuscript location: to be completed by authors.

# BMJ Open

## Protocol of a randomised trial of teriparatide followed by zoledronic acid to reduce fracture risk in adults with osteogenesis imperfecta.

|                                 |                                                                                                                                                                                                                                                                                                                                                                                                                                                                                                                                                                                                                                                                                                       |
|---------------------------------|-------------------------------------------------------------------------------------------------------------------------------------------------------------------------------------------------------------------------------------------------------------------------------------------------------------------------------------------------------------------------------------------------------------------------------------------------------------------------------------------------------------------------------------------------------------------------------------------------------------------------------------------------------------------------------------------------------|
| Journal:                        | <i>BMJ Open</i>                                                                                                                                                                                                                                                                                                                                                                                                                                                                                                                                                                                                                                                                                       |
| Manuscript ID                   | bmjopen-2023-078164.R1                                                                                                                                                                                                                                                                                                                                                                                                                                                                                                                                                                                                                                                                                |
| Article Type:                   | Protocol                                                                                                                                                                                                                                                                                                                                                                                                                                                                                                                                                                                                                                                                                              |
| Date Submitted by the Author:   | 04-Sep-2023                                                                                                                                                                                                                                                                                                                                                                                                                                                                                                                                                                                                                                                                                           |
| Complete List of Authors:       | Hald, Jannie ; Aarhus University Hospital, Dept of Endocrinology and Internal Medicine<br>Keerie, Catriona; University of Edinburgh College of Medicine and Veterinary Medicine<br>Weir, Christopher; The University of Edinburgh<br>Javaid, Kassim; University of Oxford, Oxford NIHR Musculoskeletal Biomedical Research Unit<br>Lam, Wayne; University of Edinburgh Western General Hospital, Centre for Genomic and Experimental Medicine<br>Osborne, Patricia; Brittle Bone Society<br>Walsh, Jennifer; The University of Sheffield, Oncology and Metabolism<br>Langdahl, Bente L.; Aarhus Universitet, Dept of Endocrinology and Internal Medicine<br>Ralston, Stuart; Western General Hospital |
| <b>Primary Subject Heading</b>: | Rheumatology                                                                                                                                                                                                                                                                                                                                                                                                                                                                                                                                                                                                                                                                                          |
| Secondary Subject Heading:      | Pharmacology and therapeutics                                                                                                                                                                                                                                                                                                                                                                                                                                                                                                                                                                                                                                                                         |
| Keywords:                       | Randomized Controlled Trial, INTERNAL MEDICINE, RHEUMATOLOGY, Calcium & bone < DIABETES & ENDOCRINOLOGY                                                                                                                                                                                                                                                                                                                                                                                                                                                                                                                                                                                               |
|                                 |                                                                                                                                                                                                                                                                                                                                                                                                                                                                                                                                                                                                                                                                                                       |

SCHOLARONE™  
Manuscripts



1  
2  
3  
4  
5  
6  
7  
8  
9  
10  
11  
12  
13  
14  
15  
16  
17  
18  
19  
20  
21  
22  
23  
24  
25  
26  
27  
28  
29  
30  
31  
32  
33  
34  
35  
36  
37  
38  
39  
40  
41  
42  
43  
44  
45  
46  
47  
48  
49  
50  
51  
52  
53  
54  
55  
56  
57  
58  
59  
60

## Protocol of a randomised trial of teriparatide followed by zoledronic acid to reduce fracture risk in adults with osteogenesis imperfecta.

Jannie D Hald<sup>1</sup>, Catriona Keerie<sup>2</sup>, Christopher J. Weir<sup>2</sup>, M Kassim Javaid<sup>3</sup>, Wayne Lam<sup>4</sup>, Patricia Osborne<sup>5</sup>, Jennifer Walsh<sup>6</sup>, Bente Langdahl<sup>1</sup>, Stuart H. Ralston<sup>7</sup>

- <sup>1</sup> Dept of Endocrinology and Internal Medicine, Aarhus University Hospital, 8200 Aarhus N, Denmark
- <sup>2</sup> Edinburgh Clinical Trials Unit, Usher Institute, University of Edinburgh, Nine Edinburgh Bioquarter, Little France Road, Edinburgh, EH16 4UX, United Kingdom
- <sup>3</sup> Botnar Research Centre, Nuffield Department of Orthopaedics, Rheumatology & Musculoskeletal Sciences, University of Oxford, Oxford, UK
- <sup>4</sup> Brittle Bone Society (BBS), 30 Guthrie St, Dundee DD1 5BS, UK.
- <sup>5</sup> Southeast Scotland Clinical Genetics Service, Western General Hospital, Edinburgh
- <sup>6</sup> Mellanby Centre for Bone Research, University of Sheffield, Sheffield, UK
- <sup>7</sup> Centre for Genomic and Experimental Medicine, Institute of Genetics and Cancer University of Edinburgh, Western General Hospital, Edinburgh, EH 2XU, United Kingdom.

Corresponding author:

Professor Stuart H Ralston  
Centre for Genomic and Experimental Medicine,  
Institute of Genetics and Molecular Medicine,  
University of Edinburgh,  
Western General Hospital,  
Edinburgh, EH 2XU, United Kingdom.  
Email: [stuart.ralston@ed.ac.uk](mailto:stuart.ralston@ed.ac.uk)

**ABSTRACT**

**Introduction:** Osteogenesis imperfecta (OI) is a rare genetic disease associated with multiple fractures throughout life. It is often treated with osteoporosis medications but their effectiveness at preventing fractures is unknown. The Treatment of Osteogenesis Imperfecta with Parathyroid Hormone and Zoledronic Acid (TOPAZ) trial will determine if therapy with teriparatide (TPTD) followed by zoledronic acid (ZA) can reduce the risk of clinical fractures in OI.

**Methods and analysis:** Individuals aged  $\geq 18$  years with a clinical diagnosis of OI are eligible to take part. At baseline, participants will undergo a spine x-ray, and have bone mineral density (BMD) measured by dual x-ray energy absorptiometry (DXA) at the spine and hip. Information on previous fractures, and previous bone targeted treatments will be collected. Questionnaires will be completed to assess pain and other aspects of health related quality of life (HRQoL). Participants will be randomised to receive a two year course of TPTD injections 20mcg daily followed by a single intravenous infusion of 5mg Zoledronic acid (ZA), or to receive standard care, which will exclude the use of bone anabolic drugs. Participants will be followed up annually, have a repeat DXA at 2 years and at the end of study. Spine x-rays will be repeated at the end of study. The duration of follow-up will range between two and eight years.

The primary endpoint will be new clinical fractures confirmed by x-ray or other imaging. Secondary endpoints will include participant reported fractures, BMD and changes in pain and HRQoL.

**Ethics and Dissemination:** The study received ethical approval in December 2016. Following completion of the trial, a manuscript will be submitted to a peer-reviewed journal. The results will inform clinical practice by determining if TPTD/ZA can reduce the risk of fractures in OI compared with standard care.

**Trial registration number:** ISRCTN15313991. Pre-results.

Abstract: 297 words

Total word count: 4718

**Strengths and limitations**

- This is the first randomised controlled trial to determine whether any medical treatment can reduce the risk of fractures in osteogenesis imperfecta.
- The inclusion of all adults with a clinical diagnosis of OI ensures that the results will have external validity and be widely applicable to adults with OI
- The choice of teriparatide followed by zoledronic acid (TPTD/ZA) is expected to give a sustained anabolic response in the active group and to provide proof of concept that anabolic agents are superior to no active treatment or other bone targeted therapies which work by inhibiting bone resorption.
- The randomised design with adjudication of the primary endpoint by observers blinded to treatment allocation will eliminate assessment bias.
- As the study is not double blind this may influence participant reported outcomes as they know which treatment strategy they have been allocated to receive.
- As many different therapies can be used in the standard care group and these are not randomly allocated to participants. we will not be able to determine how the effectiveness individual therapies in the standard care group compares with the combination of TPTD/ZA.

**Keywords:**

Osteogenesis imperfecta, bisphosphonate; zoledronic acid; teriparatide; randomized controlled trial.

## INTRODUCTION

Osteogenesis imperfecta refers to a group of inherited disorders characterised by large numbers of low trauma fractures, sometimes presenting in utero or during early childhood (1). Several other clinical features may be observed such as bone deformity, scoliosis, kyphosis, growth retardation, dental abnormalities, blue sclera, hearing loss, ligament laxity and an increased risk of cardiopulmonary disease in adulthood. In routine clinical practice, it is common to use the Sillence classification (2) to assign a subtype based on severity. This ranges from mild (Type I) through moderate (Type IV) and severe (Type III) to lethal (Type II). As new genes for osteogenesis imperfecta have been discovered a new classification system has emerged (3) which introduces new subtypes related to the underlying genetic abnormality while retaining the Sillence classification for defects associated with mutations in the type 1 collagen genes. Irrespective of the underlying genetic cause, bone fragility is greatly increased in osteogenesis imperfecta. Reduced bone mass (4) and abnormalities of cortical thickness and trabecular architecture play a role (5) but these abnormalities are compounded by defects in bone matrix, which profoundly affect bone quality. There is also evidence that rates of bone turnover are abnormally increased particularly in types III and IV OI (5) (6). A puzzling feature of OI that remains poorly understood is increased mineralisation of bone. This was first described by Boyde and colleagues (7), but subsequently had been confirmed in most types of OI by various investigators (8-12). This has relevance to the pathogenesis of fractures since bone that is highly mineralised is also more brittle.

The medical management of osteogenesis imperfecta is currently based on giving drugs that are used to treat osteoporosis, working on the assumption that medications which increase bone density and/or reduce bone turnover might favourably influence clinical outcome and reduce fracture risk (1). The most widely used drugs are bisphosphonates. Randomised controlled trials of bisphosphonates in OI have consistently shown that BMD is increased, and biochemical markers of bone turnover decreased as compared with no treatment or placebo (13-15). The effects of bisphosphonates on fracture are conflicting, however. Successive Cochrane reviews (13-15) and a meta-analysis of randomised trials (16) have concluded that the effects of bisphosphonates on fracture rate are uncertain while also acknowledging that the studies performed so far have been underpowered to detect a reduction in fracture incidence. A possible reason for the disappointing results with bisphosphonates is that they increase mineralisation of bone (17) which might cause the bone to be more brittle. Teriparatide has been evaluated in one study of patients with OI compared with placebo (18). This showed an increase in BMD and a numerical reduction in the incidence of new fractures, but this was not statistically significant. Like the bisphosphonate trials, this study was not powered to detect a reduction in fracture incidence.

1  
2  
3 This study is the first trial ever attempted in OI where reduction in fracture incidence has been the  
4 primary outcome.  
5

## 6 **METHODS AND ANALYSIS**

7  
8 The TOPAZ trial is a multicentre open label randomised parallel group trial which has been designed  
9 to determine if a two year course of anabolic therapy with TPTD followed by a single infusion of  
10 zoledronic acid (ZA) to maintain the increase in BMD is superior to standard care at reducing the risk  
11 of new clinical fractures in adults with osteogenesis imperfecta. The participants and investigators will  
12 not be blinded to treatment allocation, but ascertainment of fractures will be performed by imaging  
13 experts who are blinded to treatment allocation. The TOPAZ trial is therefore an example of a  
14 Prospective, randomized open, blinded end-point (PROBE) study design. A graphical overview of the  
15 study design and participant timelines is provided in Figure 1. The primary objective of the study is to  
16 determine if TPD/ZA reduces the risk of clinical fractures in OI compared with standard care,  
17 Secondary objectives are to determine if TPTD/ZA reduces the risk of participant reported fractures,  
18 all fractures (participant reported and imaging confirmed) and vertebral fractures. The study also aims  
19 to determine if TPTD/ZA increases BMD compared with standard care, and to determine if it  
20 favourably affects quality of life, pain and sleep quality.  
21  
22  
23  
24  
25  
26  
27  
28  
29

### 30 **Eligibility criteria**

31 Those eligible will be 18 years of age or older, with a clinical diagnosis of osteogenesis imperfecta.  
32 Eligibility and exclusion criteria are summarised in Table 1. Women of childbearing potential will be  
33 permitted to take part in the study provided that they agree to practice a medically robust form of  
34 contraception (an intra-uterine device, a barrier method with spermicide, condoms, subdermal  
35 implant or oral contraceptive) during TPTD treatment and for at least 12 months after the ZA infusion.  
36 Women who are pregnant or lactating at the time of randomisation will be excluded. In the event that  
37 a woman becomes pregnant or is lactating during the study, bone-targeted medicines will be stopped  
38 – with the exception of calcium supplements and vitamin D supplements - until the patient is no longer  
39 pregnant and has ceased lactating.  
40  
41  
42  
43  
44  
45  
46

### 47 **Study assessments**

48 The schedule of assessments which will be collected at baseline and during the study are summarised  
49 in Table 2 and are discussed individually in more detail below.  
50

#### 51 *Clinical assessment*

52 Participants will undergo a clinical assessment and physical examination at the baseline visit.  
53 Information will be collected on subtype of OI, family history of OI, presence bone deformity, use of a  
54 hearing aid, presence of dentinogenesis imperfecta, colour of sclerae, height, weight, past medical  
55 history, alcohol use and smoking habit, dietary calcium intake by food frequency questionnaire,  
56  
57  
58  
59  
60

1  
2  
3 current medications and any bone specific medications received during the previous two years.  
4 Participants will be re-evaluated clinically after two years and again at the end of trial visit.

#### 6 *Bone Mineral Density*

8 Bone mineral density (BMD) will be measured by dual energy x-ray absorptiometry (DXA) at the  
9 lumbar spine and hip according to standard techniques at the participating centres. Measurements  
10 will be performed at baseline, after 2 years and at the end of the study. Participants in whom DXA is  
11 not feasible for technical reasons such as in patients with metalwork in situ as the result of previous  
12 fractures or because of multiple vertebral fractures will be included in the study. These individuals  
13 will be considered to have a BMD T-Score of <-2.5 for the purpose of minimisation.

#### 18 *Spine x-rays*

20 Lateral x-rays of the lumbar and thoracic spine will be performed according to standard techniques at  
21 baseline and at the end of study to detect the presence of existing and emergence of new vertebral  
22 fractures. These images will be adjudicated by imaging experts blinded to treatment allocation who  
23 will record the site and severity of vertebral fractures at baseline and evaluate whether new fractures  
24 or worsening of existing fractures has occurred at the end of study.

#### 28 *Imaging of suspected fractures*

30 Participants who develop symptoms or signs to suggest that a new fracture has occurred during the  
31 study will have imaging by x-ray or another imaging modality to evaluate whether a fracture has  
32 occurred. These images will be adjudicated by an imaging expert blinded to treatment allocation who  
33 will record the site of fracture.

#### 36 *Safety bloods*

38 Measurements of safety bloods will include serum creatinine, serum total alkaline phosphatase,  
39 calcium, albumin and 25(OH)D. The estimated GFR (eGFR) will be calculated from serum creatinine,  
40 gender and weight.

#### 43 *Specialised markers of bone turnover*

45 Serum samples will be collected and stored for measurement of biochemical markers of bone turnover  
46 at baseline, 24 months and at the end of study. The markers to be assessed will include serum type I  
47 collagen C-telopeptides (CTX) as a marker of bone resorption and procollagen type I amino-terminal  
48 propeptide (PINP) as a marker of bone formation. These samples will be aliquoted and stored locally  
49 at -80°C and shipped on dry ice to the central laboratory.

#### 53 *Health related quality of life*

55 Health-related quality of life will be assessed by completion of the SF36 questionnaire (19), the  
56 Stanford Health Assessment Questionnaire (HAQ) (20) and the EuroQol 5D (EQ5D) (21) questionnaire  
57 at baseline, annual visits and the end of study visit.

### *Pain*

The presence and location of pain will be assessed by completion of the Brief Pain Inventory (BPI) (22) at baseline, annual visits and the end of study visit.

### *Sleep quality*

Sleep quality will be assessed by the Pittsburgh Sleep Quality Index (PSQI) questionnaire (23)

### *Genetic testing*

Genetic testing will be carried out by the NHS Molecular Genetics Laboratory in Edinburgh on genomic DNA extracted from peripheral blood. The testing will be carried out using a custom-designed Bioscience panel for library construction and enrichment, followed by pair-end DNA sequencing using an Illumina MiSeq platform. This will be used to sequence the coding regions (+/- 15bp) of the following 16 genes implicated in the pathogenesis of osteogenesis imperfecta: *BMP1*, *COL1A1*, *COL1A2*, *CRTAP*, *FKBP10*, *IFITM5*, *PH31*, *PLOD2*, *PLS3*, *PPIB*, *SERPINF1*, *SERPINH1*, *SP7*, *SPARC*, *TMEM38B* and *WNT1*. Any pathogenic variants will be confirmed by Sanger sequencing using standard techniques.

### **Outcome measures**

The outcome measures are summarised in Table 3. The primary outcome will be the proportion of participants experiencing a clinical fracture validated by x-ray or other imaging. Secondary outcomes will include the total number of new fractures (participant reported and imaging validated combined), participant reported fractures (whether or not validated by imaging), the number of new vertebral fractures, changes in BMD, and biochemical markers of bone turnover, changes in bone pain, assessed by the BPI and changes in quality-of-life measures (EQ5D, HAQ, and SF36) and changes in sleep quality assessed by the PSQI.

### **Interventions**

The investigational medicinal products (IMP) in the active arm will be teriparatide (Forsteo®) given by subcutaneous injection in a dose of 20mcg daily for two years supplied by Eli Lilly Pharmaceuticals. This will be followed by a single dose zoledronic acid 5mg given by intravenous infusion over a period of not less than 15minutes. It is permissible for participants to temporarily stop (defined as  $\geq 3$  consecutive days) TPTD during the treatment period for up to 12 weeks. If this occurs the duration of the interruption and reason will be logged in the trial database. An interruption of greater than 12weeks will be considered a permanent discontinuation. Participants who permanently discontinue TPTD before 12 months will revert to receiving standard care. Those who receive 12 months or more will be invited to attend for a ZA infusion or treatment with an alternative antiresorptive agent within 4 weeks of stopping therapy. For participants with a body weight <30kg the dose of TPTD will be reduced to 20mcg given twice weekly by subcutaneous

1  
2  
3 injection for 24 months. Treatment will be followed by an infusion of ZA in a dose of 0.10 mg/Kg  
4 over 15 minutes within 4 weeks of the last TPTD dose. If TPTD therapy needs to be discontinued  
5 before 12 months for any reason, the participant will not routinely be given ZA on termination of  
6 TPTD therapy but instead revert to receiving standard care.  
7  
8

9  
10 In the standard care arm, participants may be treated with oral or intravenous bisphosphonates,  
11 denosumab, calcium supplements, vitamin D supplements or combined calcium and vitamin D  
12 supplements at the discretion of investigators at study sites. Participants who are sexually active will  
13 receive specific advice about the possible risks associated with getting pregnant whilst in the trial  
14 and will be asked to agree to practice a medically acceptable form of birth control during the study if  
15 receiving bone targeted therapies with the exception of calcium and vitamin D.  
16  
17

18  
19 In the active group, information on adherence to TPTD will be gathered using participant diaries. In  
20 the standard care group, participants will also be asked to record treatment with bone targeted  
21 medications throughout the study.  
22  
23

#### 24 25 **Prohibited medications**

26 Treatment with investigational medicinal products with effects on bone metabolism will be  
27 prohibited in both groups. In the standard care arm bone anabolic agents such as TPTD and  
28 romosozumab will be prohibited. During the phase of treatment with TPTD, the following drugs will  
29 be prohibited; bisphosphonates, denosumab, strontium ranelate, calcitonin, romosozumab and  
30 investigational (experimental) drugs with effects on bone metabolism. These drugs will also be  
31 prohibited within 36 months of receiving ZA to avoid over suppression of bone turnover. An  
32 exception would be if for any reason ZA cannot be given to maintain the increase in BMD following  
33 TPTD. In this case an alternative antiresorptive agent (including denosumab within this context only)  
34 may be given on discussion with the co-ordinating centre.  
35  
36  
37  
38  
39  
40

#### 41 42 **Permitted Interventions and Medications**

43 Participants can continue to receive non-pharmacological interventions and medicines used as part  
44 of normal medical care throughout the study.  
45  
46

#### 47 48 **Recruitment and randomisation**

49 The main route of recruitment to the study will be through the potential participants' normal care  
50 providers, in secondary care referral centres. A full list of study sites can be obtained at the ISRCTN  
51 registry. Potential participants will be approached directly as they attend for routine outpatient clinic  
52 visits or by telephone or letter following review of clinic lists. Potential participants, who become  
53 aware of the study through other routes such as social media, the websites of the BBS or OIFE, or word  
54 of mouth, will be invited to contact the research team at the co-ordinating centre or their nearest  
55 study centre if they are interested in taking part. Following such contact, they will be provided with  
56  
57  
58  
59  
60



1  
2  
3 written information about the trial. Written informed consent will be obtained from all participants  
4 by the local principle investigator or a delegated member of the study team. A copy of the patient  
5 information sheet and consent form has been uploaded to the journal website as supplementary  
6 material. Whilst OI is a rare disease we expect that it should be possible to reach the target sample  
7 size in view of the simplicity of the study design and the fact that both groups have the option of  
8 receiving some form of active treatment if they so wish.  
9

10 Randomisation will be performed by a web based tool hosted by Edinburgh Clinical Trials Unit (ECTU)  
11 which ensures allocation concealment prior to enrolment. The randomisation algorithm uses  
12 minimisation to ensure that the groups are balanced for prognostic variables thought to influence the  
13 occurrence of fractures. These comprise clinical fracture in last 2 years, OI clinical subtype (type I vs.  
14 other subtypes), gender, age ( $\leq 50 / > 50$ ), BMD T-score ( $\leq -2.5 / > -2.5$ ) and bisphosphonate use at  
15 baseline or in 2 years prior to randomisation. Following randomisation, the study database will  
16 generate a treatment code which will be used by the research pharmacies in each participating centre  
17 to ensure that the correct medication is dispensed.  
18

#### 19 *Pre- and post-randomisation withdrawals*

20 Participants will be advised that they have the right to withdraw from the study at any time for any  
21 reason. The investigator will have the right to withdraw a participant at any time if it is deemed to be  
22 in the participant's best interest. If a participant decides that they no longer wish to continue with  
23 routine assessments or adhere to the study protocol before the planned end of trial assessment, they  
24 will be given the opportunity to attend for the end of trial assessment. The same will apply to  
25 participants in whom the local investigator decides that adherence to the trial protocol would be  
26 inappropriate.  
27

#### 28 **Statistical analysis**

29 Statistical analysis will employ the intention-to-treat principle. The main analysis of the primary  
30 outcome will summarise time to first fracture by treatment group using Kaplan-Meier survival curves,  
31 the groups being compared using the log-rank test stratified by the minimisation variables. We will  
32 review accumulation of fractures during the study and review the situation when 139 patients have  
33 suffered a clinical fracture confirmed by adjudication. This will be done by the blinded trial statistician  
34 and the TSC will then be asked to make a recommendation on continuation (or termination) of the  
35 trial. This recommendation will consider an assumption that at least 15% of participants will develop  
36 a new vertebral fracture during the study while noting that these will not be ascertained until review  
37 of spine x-rays taken at the end of study visit. A secondary analysis will use binary logistic regression,  
38 with treatment group (active vs. standard care) and the minimisation variables (fracture in last 2 years,  
39 OI clinical subtype, gender, age, BMD group and bisphosphonate use at baseline or in 2 years prior to  
40  
41  
42  
43  
44  
45  
46  
47  
48  
49  
50  
51  
52  
53  
54  
55  
56  
57  
58  
59  
60

1  
2  
3 randomisation) as the independent variables. The effect of randomised treatment will be measured  
4 by the odds ratio (and 95% confidence interval) for TPTD/ZA vs. standard care. While every effort will  
5 be made to obtain complete follow-up data on all patients, it is recognised that in the OI population  
6 some study participants will be lost to follow-up. A sensitivity analysis in which missing data are  
7 imputed will be developed according to the principles outlined in (20), namely to develop an  
8 understanding for the reasons for loss to follow-up, define the primary set of assumptions about the  
9 missing data mechanism on this basis, conduct a statistically valid analysis under these assumptions  
10 and explore the robustness of the conclusions in further sensitivity analyses that capture departures  
11 from the primary missing data assumptions.

12  
13  
14  
15  
16  
17  
18 There will be no formal interim analysis for early stopping due to efficacy or futility.

### 19 *Mechanistic Study*

20  
21 The mechanistic objective will be addressed in two stages. First, descriptive statistics of fracture rate  
22 will be summarised by treatment group for clinical subtype of OI, baseline BMD, sex, molecular  
23 diagnosis and presence of baseline vertebral fractures. Formal interim analyses of the primary  
24 outcome will be performed on each of these: the primary outcome analysis (main and secondary  
25 analyses, as described above) will be repeated, with the inclusion of an interaction term between  
26 subgroup and treatment to establish if the treatment effect differs by subgroup. This will be used to  
27 evaluate the influence of clinical subtype and molecular diagnosis on clinical outcome and to inform  
28 a subsequent individual patient data meta-analysis combining the data from this trial and the TPTD  
29 and standard care groups from the trial led by co-applicant Professor Bente Langdahl which has  
30 started recruitment in Scandinavia (EudraCT 2011-002811-27) and by sourcing data from the trial  
31 previously reported by Orwoll in which TPTD was compared with placebo in patients with OI (18).  
32 These analyses will include a fixed effect for trial and will formally test, in a separate model for each  
33 baseline variable, for an interaction between the baseline variable and the effect of TPTD (versus  
34 standard care) on fracture rate. In further pooled analyses data from the standard care groups in both  
35 trials will be combined to estimate the association between each baseline variable and fracture risk in  
36 patients receiving standard care. All analyses and data manipulations will be carried out using SAS®  
37 for Windows. SAS Institute Inc. Cary, NC, U.S.A.

### 38 **Sample size**

39  
40 The sample size has been arrived based on analysis of previous clinical trials and observational studies  
41 of adult OI patients (5-9). From these studies, we estimated that the proportion of participants  
42 experiencing a new clinical fracture each year to be about 16% in the standard care group. There have  
43 been no prospective studies on the incidence of new vertebral fracture in adults with OI, but cross-  
44 sectional studies have reported that vertebral fractures are present in between 67% (24) to 100% (25)

1  
2  
3 of individuals. We have therefore assumed that 15% of participants in the standard care group will  
4 experience a new vertebral fracture during follow-up which will be detected by spine x-rays that are  
5 being performed at the end of study. If active treatment reduces the proportion of patients who  
6 experience a fracture by 25%, this equates to an approximate absolute risk reduction of 16% (from  
7 64% to 48%) and a hazard ratio of 0.608. This is considered to be a clinically important difference. We  
8 assume that up to 11% of participants may be lost to follow up, evenly spread throughout the duration  
9 of the study. With all these assumptions, a total sample size of 350 participants (175 per group) would  
10 be expected to result in 139 patients with new clinical fractures after an average duration of 62  
11 months follow up and an additional 21 vertebral fractures detected by end of study spine x-rays (160  
12 fractures in total). If the number of fractures is as predicted above, the study would have 88% power  
13 in analysis of the primary endpoint using a 5% two-sided significance level.  
14  
15  
16  
17  
18  
19  
20  
21

### 22 **Data management**

23 Data from study visits will be entered directly onto an electronic case record forms (eCRF) by staff at  
24 study sites. The eCRF will be hosted by Edinburgh Clinical Trials Unit and linked to the main study  
25 database. The Principal Investigator at each study site will be responsible for the quality of the data  
26 recorded in the CRF. The TOPAZ study eCRF web portal and database is built and maintained by the  
27 software development team of the Edinburgh Clinical Trials Unit (ECTU), following internal standard  
28 operating procedures. The study database will not contain details of personal information about  
29 study participants but a recruitment log will be held locally in order to communicate with  
30 participants about study visits and adverse events. Confidentiality will be maintained before during  
31 and after completion of the trial. Following completion of the study and analysis of the results  
32 investigators will be given access to the final trial dataset.  
33  
34  
35  
36  
37  
38  
39

### 40 **Adverse event management**

41 At each study visit participants will be asked about primary care visits for health-related problems,  
42 medications taken, hospitalisations and any other adverse effects. In the event of hospitalisation, the  
43 patient will be asked to contact the Principal Investigator (PI) at their local study centre. Adverse  
44 events (AE), serious adverse events (SAE) and suspected unexpected serious adverse reactions  
45 (SUSAR) will be collected continuously throughout the trial. In addition, participants will be contacted  
46 by local research teams one week after receipt of the infusion to record symptoms or side-effects  
47 related to this intervention. All adverse events will be recorded from the time a participant consents  
48 to join the study until the last study visit has been completed. The investigator or a delegated member  
49 of the study team will record adverse events at every visit and participants will be instructed to contact  
50 the investigator at any time if adverse events develop. If an AE/SAE occurs, it is the responsibility of  
51 the investigator to review all documentation related to the event and evaluate seriousness, causality,  
52  
53  
54  
55  
56  
57  
58  
59  
60

1  
2  
3 severity and expectedness. Events that are considered serious, possibly, probably or definitely related  
4 to the IMP (serious adverse reactions, SAR) and unexpected (SUSAR) may be unblinded if it is  
5 necessary for clinical care. Once the investigator becomes aware that an SAE has occurred, they must  
6 report the information to the Clinical Research Governance & quality assurance office of the sponsor  
7 within 24 hours. The investigator will then be required to complete a Serious Adverse Event (SAE) form  
8 to assess causality, seriousness, severity and expectedness of the event.  
9

### 13 **Trial oversight**

14  
15 The trial is sponsored by the academic and clinical central office for research and development  
16 (ACCORD) which is a partnership between the University of Edinburgh and NHS Lothian Health  
17 Board. The study sponsor has insurance in place to compensate participants who suffer harm from  
18 trial participation. The sponsor had no role in in study design, data collection, management, analysis,  
19 interpretation, writing of the report or the decision to submit the report for publication. Monitoring  
20 of the study is being performed in accordance with a study monitoring plan developed by the  
21 sponsor. The Principal Investigators and institutions involved in the study have agreed to allow trial  
22 related monitoring, audits, Research Ethics Committee review, and regulatory inspection(s).  
23 Protocol amendments will be communicated to study centres, Research Ethics Committees, and  
24 Medicines Regulatory Authorities, according to standard procedures. A Trial Steering Committee  
25 (TSC) has been established to oversee the conduct and progress of the trial, chaired by Professor  
26 Philip Conaghan (University of Leeds), Members are SHR, CJW, JW, Prof Sarah Brown (University of  
27 Leeds), Dr Osten Ljungren (University Uppsala, Ms Coreen Kelday (Brittle Bone Society), Mr Eero  
28 Nevalainen (Patient representative and vice Chair OIFE). An independent Data Monitoring  
29 Committee chaired by Professor Anthony Woolf has been established to oversee the safety of  
30 subjects in the trial. Members are Dr Willem Lems (Amsterdam), Dr Susie Cro (Imperial College  
31 London), and CK (unblinded statistician).  
32  
33  
34  
35  
36  
37  
38  
39  
40  
41  
42

### 43 **Trial status**

44  
45 At the time of submission of this paper, recruitment to the trial has closed and the target number of  
46 350 participants were enrolled at 25 sites in 6 European countries. Participants are currently under  
47 follow-up. The trial is expected to report in April 2025  
48  
49

### 50 **Patient and public involvement**

51  
52 The study was designed with the involvement of patients with OI. Specifically, the idea for  
53 performing a randomised controlled trial to look at fracture prevention in OI arose as the result of  
54 consultations between the Chief Investigator and patients with OI under his care who were  
55 astonished to learn that physicians frequently prescribed bisphosphonate drugs as treatment for  
56 adults with OI when there was little or no evidence of their efficacy in fracture prevention . Selected  
57  
58  
59  
60

1  
2  
3 individuals from this group also provided input into the overall trial design in suggesting that it be as  
4 simple and streamlined as possible and suggesting that ideally, individuals not allocated to receive  
5 active treatment should have an option for having some sort of active therapy in discussion with  
6 their care provider. The trial has received non-financial support from the Brittle Bone Society (BBS) -  
7 a patient support group based in the UK and by the Osteogenesis Imperfecta Federation Europe  
8 (OIFE).  
9

### 13 **Ethical Approval and Dissemination**

14  
15 Ethical approval was granted by the East of Scotland Research Ethics Service (reference number  
16 16/ES/0110) on 15/09/2016. The study was also approved by local research ethics committees of all  
17 participating centres outside the UK and the medicines regulatory agencies in all participating  
18 countries.  
19

20  
21 The results of the study will be presented in abstract form at academic meetings and will be  
22 submitted to a peer-reviewed journal so that the results are disseminated to the wider medical  
23 community. The results will also be disseminated to patients with OI and their families through the  
24 website of the Brittle Bone Society. Authorship on the main paper will be determined by the  
25 International Committee of Medical Journal Editors (ICMJE) guidelines. The results of the TOPAZ trial  
26 are expected to inform clinical practice and influence clinical guidelines for the management of  
27 osteogenesis imperfecta by determining if intervention with anabolic therapy in the form of TPTD  
28 followed by ZA can reduce the risk of clinical fractures in adults with OI.  
29

### 35 **Data Statement**

36  
37 The datasets generated and analysed during this clinical trial are not yet publicly available since data  
38 collection is incomplete. It is anticipated that an anonymised dataset will be made available for  
39 sharing as soon as possible following completion of the study, database lock, analysis of the primary  
40 data and publication of the study results.  
41

### 44 **Funding**

45  
46 The study was funded by the Efficacy and Mechanism Evaluation (EME) Programme (reference EME  
47 14/200/18) which is a partnership between the UK Medical Research Council (MRC) and the National  
48 Institute of Health Research. The views expressed in this publication are those of the authors and  
49 not necessarily those of the MRC, NIHR or the Department of Health and Social Care. The  
50 teriparatide was kindly donated by Eli Lilly Pharmaceuticals. The funder and Eli Lilly had no role in in  
51 study design, data collection, management, analysis, interpretation, writing of the report nor the  
52 decision to submit the report for publication. For the purpose of open access, the author has applied  
53 a Creative Commons Attribution (CC BY) licence to any Author Accepted Manuscript version arising  
54 from this submission.  
55  
56  
57  
58  
59  
60

### **Author Statement**

First draft of the manuscript: JH & SHR; Study concept and design: SHR; Obtaining funding SHR, CJW, MKJ, WL, PO, JW, BLL. All authors commented on and revised the manuscript for intellectual content and approved the final version of the manuscript which is based on version 10 of the study protocol October 10<sup>th</sup> 2022.

### **Conflicts of Interest**

All authors report funding from the Efficacy and Mechanism Evaluation programme of the NIHR and non-financial support from Eli Lilly to support this work. Professor Langdahl reports research grants from Mereo Pharmaceuticals outside this work and consultancy funding from Amgen, UCB, and Gedeon Richter. Ms Patricia Osborne reports that she is an employee of the Brittle Bone Society. Professor Ralston reports research grants from Kyowa Kirin and Astra-Zeneca outside the submitted work and funding to his institution from Pfizer, Abbvie, Kyowa Kirin, Alexion, Amgen, Cellgene, Janssen-Cilag, Novartis, Eli Lilly, Thornton & Ross, and Sanofi Genzyme and UCB outside the submitted work. Professor Ralston also reports that he is a member of the Scientific Advisory Board of the Brittle Bone Society. Dr MK Javaid reports consultancy funding from Amgen outside the submitted work and reports that he is chair of the Medical Advisory Board of the Brittle Bone Society. Dr Walsh reports that she is a member of the Medical Advisory Board of the Brittle Bone Society. Dr Keerie and Professor Weir have no other conflicts of interest to declare.

### **Consent for publication**

The manuscript does not contain individual patient data.

### **Competing Interests**

The authors declare that they have no competing interests.

### **ACKNOWLEDGEMENTS:**

The authors wish to acknowledge the valuable support of the Brittle Bone Society (BBS) and OIFE in publicising and supporting the study and the many patients with OI who volunteered to take part. The authors also wish to acknowledge the contribution of Dr David Moore and colleagues from the NHS Molecular Genetics Laboratory in Edinburgh for the genetic testing, Ms Lynsey Milne from ECTU for data management support; Dr Holly Ennis, Ms Lorna Dewar and Dr Morag McLean for trial management support.

### **Good clinical practice**

The study will be carried out according to the principles of the International Conference on Harmonisation Tripartite Guideline for Good Clinical Practice and local guidance and regulations.

### **Consolidated standards of reporting trials**

1  
2  
3  
4  
5  
6  
7  
8  
9  
10  
11  
12  
13  
14  
15  
16  
17  
18  
19  
20  
21  
22  
23  
24  
25  
26  
27  
28  
29  
30  
31  
32  
33  
34  
35  
36  
37  
38  
39  
40  
41  
42  
43  
44  
45  
46  
47  
48  
49  
50  
51  
52  
53  
54  
55  
56  
57  
58  
59  
60

The results of the trial will be reported in accordance with the Consolidated Standards Of Reporting Trials (CONSORT) (26).

For peer review only

1  
2  
3 **Figure 1. Overview of study design**  
4  
5  
6  
7  
8  
9  
10  
11  
12  
13  
14  
15  
16  
17  
18  
19  
20  
21  
22  
23  
24  
25  
26  
27  
28  
29  
30  
31  
32  
33  
34  
35  
36  
37  
38  
39  
40  
41  
42  
43  
44  
45  
46

For peer review only



1  
2  
3  
4  
5  
6  
7  
8  
9  
10  
11  
12  
13  
14  
15  
16  
17  
18  
19  
20  
21  
22  
23  
24  
25  
26  
27  
28  
29  
30  
31  
32  
33  
34  
35  
36  
37  
38  
39  
40  
41  
42  
43  
44  
45  
46

**Table 1. Eligibility and exclusion criteria for the TOPAZ trial**

|                                                                                                                                                                                                                                                                                                                                                            |
|------------------------------------------------------------------------------------------------------------------------------------------------------------------------------------------------------------------------------------------------------------------------------------------------------------------------------------------------------------|
| <p><i>Eligibility criteria</i></p> <p>Clinical diagnosis of osteogenesis imperfecta</p> <p>Aged 18 years or over</p>                                                                                                                                                                                                                                       |
| <p><i>Exclusion criteria</i></p> <p>Unwilling or unable to provide informed consent</p> <p>Contraindication to zoledronic acid</p> <p>Contraindication to teriparatide</p> <p>Estimated GFR (eGFR) &lt; 35ml/min</p> <p>Already taking part in another randomised controlled clinical trial</p> <p>Pregnancy or lactation at the time of randomisation</p> |

For peer review only

**Table 2. Schedule of assessments**

|                                            | Baseline visit | <i>Additional safety bloods for participants &lt;30kg only</i> |       |        | 4-monthly TPTD -supply | 6 monthly telephone contact | 12-month visit | 24-month visit | 6 monthly telephone contact | End of Study Visit |
|--------------------------------------------|----------------|----------------------------------------------------------------|-------|--------|------------------------|-----------------------------|----------------|----------------|-----------------------------|--------------------|
|                                            |                | 2 Wk.                                                          | 4 Wk. | 12 Wk. |                        |                             |                |                |                             |                    |
| Informed consent                           | X              |                                                                |       |        |                        |                             |                |                |                             |                    |
| Inclusion/exclusion                        | X              |                                                                |       |        |                        |                             |                |                |                             |                    |
| Demographic data                           | X              |                                                                |       |        |                        |                             |                |                |                             |                    |
| Medical history                            | X              |                                                                |       |        |                        |                             |                |                |                             |                    |
| Clinical exam                              | X              |                                                                |       |        |                        |                             | X              | X              |                             | X                  |
| DEXA                                       | X <sup>1</sup> |                                                                |       |        |                        |                             |                | X              |                             | X <sup>1</sup>     |
| Spine x-ray                                | X              |                                                                |       |        |                        |                             |                |                |                             | X                  |
| HRQCT                                      | X <sup>1</sup> |                                                                |       |        |                        |                             | X              | X              |                             | X <sup>1</sup>     |
| Safety bloods                              | X              | X                                                              | X     | X      |                        |                             | X              | X              |                             | X                  |
| Sample for genetic analysis                | X              |                                                                |       |        |                        |                             |                |                |                             |                    |
| Biochemical markers                        | X              |                                                                |       |        |                        |                             | X              | X              |                             | X                  |
| Pregnancy test                             | X              |                                                                |       |        |                        |                             |                | X              |                             |                    |
| Participant Questionnaire Pack             | X              |                                                                |       |        |                        |                             | X              | X              |                             | X                  |
| Training on treatment                      | X              |                                                                |       |        |                        |                             |                |                |                             |                    |
| Treatment diary issue                      | X              |                                                                |       |        |                        |                             |                |                |                             |                    |
| Diary data entry                           |                |                                                                |       |        | X                      | X                           | X              | X              | X                           | X                  |
| TPTD accountability                        |                |                                                                |       |        | X                      | X                           | X              | X              |                             |                    |
| Adverse events                             |                |                                                                |       |        | X                      | X                           | X              | X              | X                           | X                  |
| Medications check                          |                |                                                                |       |        | X                      | X                           | X              | X              | X                           | X                  |
| ZA infusion                                |                |                                                                |       |        |                        |                             |                | X              |                             |                    |
| X-rays for incident fractures <sup>2</sup> |                |                                                                |       |        |                        | X                           | X              | X              | X                           | X                  |

<sup>1</sup>. Not required for participants who have had a 24-month visit DEXA scan or HRQCT scan within 3 months of the end of trial visit. <sup>2</sup> x-rays may be taken at any point throughout the trial when participants report the occurrence of possible incident fractures

**Table 3. Summary of primary and secondary objectives**

|                                                                                                                                                                                                                                                                                                                                                                                                                                                                                                                                                                                                                                                                                                                                                                                                                                                                                                                                                                                                                                           |
|-------------------------------------------------------------------------------------------------------------------------------------------------------------------------------------------------------------------------------------------------------------------------------------------------------------------------------------------------------------------------------------------------------------------------------------------------------------------------------------------------------------------------------------------------------------------------------------------------------------------------------------------------------------------------------------------------------------------------------------------------------------------------------------------------------------------------------------------------------------------------------------------------------------------------------------------------------------------------------------------------------------------------------------------|
| <b>Primary Objective</b>                                                                                                                                                                                                                                                                                                                                                                                                                                                                                                                                                                                                                                                                                                                                                                                                                                                                                                                                                                                                                  |
| To determine if TPTD/ZA: <ul style="list-style-type: none"> <li>• Reduces the total number of clinical fractures in adults with osteogenesis imperfecta compared with standard care</li> </ul>                                                                                                                                                                                                                                                                                                                                                                                                                                                                                                                                                                                                                                                                                                                                                                                                                                            |
| <b>Secondary objectives</b>                                                                                                                                                                                                                                                                                                                                                                                                                                                                                                                                                                                                                                                                                                                                                                                                                                                                                                                                                                                                               |
| To determine if TPTD/ZA: <ul style="list-style-type: none"> <li>• Reduces the number of incident vertebral fractures assessed by imaging of the thoracic and lumbar spine.</li> <li>• Reduces the total number of fractures experienced by participants defined as the combination validated clinical fractures and vertebral fractures and fractures reported by participants, where imaging was not performed, not feasible or where the results were inconclusive.</li> <li>• Increases BMD as compared with standard care.</li> <li>• Reduces the number of patient-reported fractures</li> <li>• Influences bone pain assessed by the brief pain inventory (BPI)</li> <li>• Influences quality of life as assessed by the SF36 questionnaire;</li> <li>• Influences sleep quality assessed by the PSQI questionnaire</li> <li>• Influences functional status as assessed by the health assessment questionnaire (HAQ) and EuroQoL5D (EQ5D) assessment tools</li> <li>• Influences biochemical markers of bone remodelling</li> </ul> |

1  
2  
3  
4  
5  
6  
7  
8  
9  
10  
11  
12  
13  
14  
15  
16  
17  
18  
19  
20  
21  
22  
23  
24  
25  
26  
27  
28  
29  
30  
31  
32  
33  
34  
35  
36  
37  
38  
39  
40  
41  
42  
43  
44  
45  
46

**References:**

1. Ralston SH, Gaston MS. Management of Osteogenesis Imperfecta. *Front Endocrinol (Lausanne)*. 2019;10:924.
2. Sillence DO, Senn A, Danks DM. Genetic heterogeneity in osteogenesis imperfecta. *J Med Genet*. 1979;16(2):101-16.
3. Forlino A, Marini JC. Osteogenesis imperfecta. *Lancet*. 2016;387(10028):1657-71.
4. Wekre LL, Eriksen EF, Falch JA. Bone mass, bone markers and prevalence of fractures in adults with osteogenesis imperfecta. *Arch Osteoporos*. 2011;6:31-8.
5. Rauch F, Travers R, Parfitt AM, Glorieux FH. Static and dynamic bone histomorphometry in children with osteogenesis imperfecta. *Bone*. 2000;26(6):581-9.
6. Braga V, Gatti D, Rossini M, Colapietro F, Battaglia E, Viapiana O, et al. Bone turnover markers in patients with osteogenesis imperfecta. *Bone*. 2004;34(6):1013-6.
7. Boyde A, Travers R, Glorieux FH, Jones SJ. The mineralization density of iliac crest bone from children with osteogenesis imperfecta. *Calcif Tissue Int*. 1999;64(3):185-90.
8. Fratzl-Zelman N, Morello R, Lee B, Rauch F, Glorieux FH, Misof BM, et al. CRTAP deficiency leads to abnormally high bone matrix mineralization in a murine model and in children with osteogenesis imperfecta type VII. *Bone*. 2010;46(3):820-6.
9. Roschger P, Fratzl-Zelman N, Misof BM, Glorieux FH, Klaushofer K, Rauch F. Evidence that abnormal high bone mineralization in growing children with osteogenesis imperfecta is not associated with specific collagen mutations. *Calcif Tissue Int*. 2008;82(4):263-70.
10. Fratzl-Zelman N, Schmidt I, Roschger P, Glorieux FH, Klaushofer K, Fratzl P, et al. Mineral particle size in children with osteogenesis imperfecta type I is not increased independently of specific collagen mutations. *Bone*. 2014;60:122-8.

- 1  
2  
3 11. Fratzl-Zelman N, Barnes AM, Weis M, Carter E, Hefferan TE, Perino G, et al. Non-  
4 Lethal Type VIII Osteogenesis Imperfecta Has Elevated Bone Matrix Mineralization. *J Clin*  
5 *Endocrinol Metab.* 2016;101(9):3516-25.  
6  
7  
8  
9
- 10 12. Fratzl-Zelman N, Schmidt I, Roschger P, Roschger A, Glorieux FH, Klaushofer K, et al.  
11 Unique micro- and nano-scale mineralization pattern of human osteogenesis imperfecta  
12 type VI bone. *Bone.* 2015;73:233-41.  
13  
14  
15
- 16 13. Dwan K, Phillipi CA, Steiner RD, Basel D. Bisphosphonate therapy for osteogenesis  
17 imperfecta. *Cochrane Database Syst Rev.* 2016;10:CD005088.  
18  
19  
20  
21
- 22 14. Dwan K, Phillipi CA, Steiner RD, Basel D. Bisphosphonate therapy for osteogenesis  
23 imperfecta. *Cochrane Database Syst Rev.* 2014(7):CD005088.  
24  
25  
26
- 27 15. Phillipi CA, Remington T, Steiner RD. Bisphosphonate therapy for osteogenesis  
28 imperfecta. *Cochrane Database Syst Rev.* 2008(4):CD005088.  
29  
30  
31
- 32 16. Hald JD, Evangelou E, Langdahl BL, Ralston SH. Bisphosphonates for the prevention  
33 of fractures in osteogenesis imperfecta: meta-analysis of placebo-controlled trials. *J Bone*  
34 *Miner Res.* 2015;30(5):929-33.  
35  
36  
37  
38
- 39 17. Boivin GY, Chavassieux PM, Santora AC, Yates J, Meunier PJ. Alendronate increases  
40 bone strength by increasing the mean degree of mineralization of bone tissue in  
41 osteoporotic women. *Bone.* 2000;27(5):687-94.  
42  
43  
44  
45
- 46 18. Orwoll ES, Shapiro J, Veith S, Wang Y, Lapidus J, Vanek C, et al. Evaluation of  
47 teriparatide treatment in adults with osteogenesis imperfecta. *J Clin Invest.*  
48 2014;124(2):491-8.  
49  
50  
51
- 52 19. Ware JE, Jr., Gandek B. Overview of the SF-36 Health Survey and the International  
53 Quality of Life Assessment (IQOLA) Project. *J Clin Epidemiol.* 1998;51(11):903-12.  
54  
55  
56  
57  
58  
59  
60

- 1  
2  
3  
4  
5  
6  
7  
8  
9  
10  
11  
12  
13  
14  
15  
16  
17  
18  
19  
20  
21  
22  
23  
24  
25  
26  
27  
28  
29  
30  
31  
32  
33  
34  
35  
36  
37  
38  
39  
40  
41  
42  
43  
44  
45  
46  
47  
48  
49  
50  
51  
52  
53  
54  
55  
56  
57  
58  
59  
60
20. Bruce B, Fries JF. The Stanford Health Assessment Questionnaire: a review of its history, issues, progress, and documentation. *J Rheumatol*. 2003;30(1):167-78.
21. Rabin R, de Charro F. EQ-5D: a measure of health status from the EuroQol Group. *Ann Med*. 2001;33(5):337-43.
22. Atkinson TM, Mendoza TR, Sit L, Passik S, Scher HI, Cleeland C, et al. The Brief Pain Inventory and its "pain at its worst in the last 24 hours" item: clinical trial endpoint considerations. *Pain Med*. 2010;11(3):337-46.
23. Buysse DJ, Reynolds CF, 3rd, Monk TH, Berman SR, Kupfer DJ. The Pittsburgh Sleep Quality Index: a new instrument for psychiatric practice and research. *Psychiatry Res*. 1989;28(2):193-213.
24. Wekre LL, Kjensli A, Aasand K, Falch JA, Eriksen EF. Spinal deformities and lung function in adults with osteogenesis imperfecta. *Clin Respir J*. 2014;8(4):437-43.
25. Adami S, Gatti D, Colapietro F, Fracassi E, Braga V, Rossini M, et al. Intravenous neridronate in adults with osteogenesis imperfecta. *J Bone Miner Res*. 2003;18(1):126-30.
26. Schulz KF, Altman DG, Moher D, Group C. CONSORT 2010 Statement: updated guidelines for reporting parallel group randomised trials. *Trials*. 2010;11:32.

1  
2  
3  
4  
5  
6  
7  
8  
9  
10  
11  
12  
13  
14  
15  
16  
17  
18  
19  
20  
21  
22  
23  
24  
25  
26  
27  
28  
29  
30  
31  
32  
33  
34  
35  
36  
37  
38  
39  
40  
41  
42  
43  
44  
45  
46  
47  
48  
49  
50  
51  
52  
53  
54  
55  
56  
57  
58  
59  
60

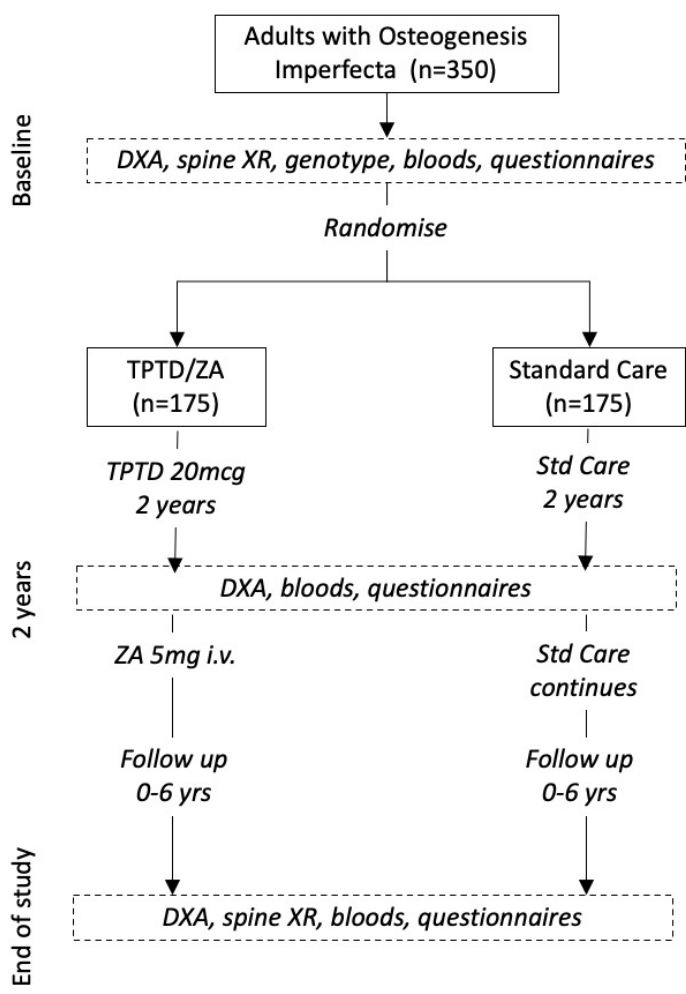

Figure 1. Overview of study design

190x275mm (96 x 96 DPI)

**SPIRIT-Outcomes 2022 Checklist (for combined completion of SPIRIT 2013 and SPIRIT-Outcomes 2022 items)<sup>a</sup>**

| Section                           | Item No. | SPIRIT 2013 Item                                                                                                                                                                                                                                                                         | SPIRIT-Outcomes 2022 item | Location Reported <sup>b</sup> |
|-----------------------------------|----------|------------------------------------------------------------------------------------------------------------------------------------------------------------------------------------------------------------------------------------------------------------------------------------------|---------------------------|--------------------------------|
| <b>Administrative information</b> |          |                                                                                                                                                                                                                                                                                          |                           |                                |
| Title                             | 1        | Descriptive title identifying the study design, population, interventions, and, if applicable, trial acronym                                                                                                                                                                             | -                         |                                |
| Trial registration                | 2a       | Trial identifier and registry name. If not yet registered, name of intended registry                                                                                                                                                                                                     | -                         |                                |
|                                   | 2b       | All items from the World Health Organization Trial Registration Data Set                                                                                                                                                                                                                 | -                         |                                |
| Protocol version                  | 3        | Date and version identifier                                                                                                                                                                                                                                                              | -                         |                                |
| Funding                           | 4        | Sources and types of financial, material, and other support                                                                                                                                                                                                                              | -                         |                                |
| Roles and responsibilities        | 5a       | Names, affiliations, and roles of protocol contributors                                                                                                                                                                                                                                  | -                         |                                |
|                                   | 5b       | Name and contact information for the trial sponsor                                                                                                                                                                                                                                       | -                         |                                |
|                                   | 5c       | Role of study sponsor and funders, if any, in study design; collection, management, analysis, and interpretation of data; writing of the report; and the decision to submit the report for publication, including whether they will have ultimate authority over any of these activities | -                         |                                |
|                                   | 5d       | Composition, roles, and responsibilities of the coordinating centre, steering committee, endpoint adjudication committee, data management team, and other individuals or groups overseeing the trial, if applicable (see Item 21a for data monitoring committee)                         | -                         |                                |
| <b>Introduction</b>               |          |                                                                                                                                                                                                                                                                                          |                           |                                |
| Background and rationale          | 6a       | Description of research question and justification for undertaking the trial, including summary of relevant studies (published and unpublished) examining benefits and harms for each intervention                                                                                       | -                         |                                |
|                                   | 6b       | Explanation for choice of comparators                                                                                                                                                                                                                                                    | -                         |                                |
| Objectives                        | 7        | Specific objectives or hypotheses                                                                                                                                                                                                                                                        | -                         |                                |



| Section                                                   | Item No. | SPIRIT 2013 Item                                                                                                                                                                                                                                                                                                                                                               | SPIRIT-Outcomes 2022 item | Location Reported <sup>b</sup> |
|-----------------------------------------------------------|----------|--------------------------------------------------------------------------------------------------------------------------------------------------------------------------------------------------------------------------------------------------------------------------------------------------------------------------------------------------------------------------------|---------------------------|--------------------------------|
| Trial design                                              | 8        | Description of trial design including type of trial (eg, parallel group, crossover, factorial, single group), allocation ratio, and framework (eg, superiority, equivalence, noninferiority, exploratory)                                                                                                                                                                      | -                         |                                |
| <b>Methods: Participants, interventions, and outcomes</b> |          |                                                                                                                                                                                                                                                                                                                                                                                |                           |                                |
| Study setting                                             | 9        | Description of study settings (eg, community clinic, academic hospital) and list of countries where data will be collected. Reference to where list of study sites can be obtained                                                                                                                                                                                             | -                         |                                |
| Eligibility criteria                                      | 10       | Inclusion and exclusion criteria for participants. If applicable, eligibility criteria for study centres and individuals who will perform the interventions (eg, surgeons, psychotherapists)                                                                                                                                                                                   | -                         |                                |
| Interventions                                             | 11a      | Interventions for each group with sufficient detail to allow replication, including how and when they will be administered (for specific guidance see TIDieR checklist and guide)                                                                                                                                                                                              | -                         |                                |
|                                                           | 11b      | Criteria for discontinuing or modifying allocated interventions for a given trial participant (eg, drug dose change in response to harms, participant request, or improving/worsening disease)                                                                                                                                                                                 | -                         |                                |
|                                                           | 11c      | Strategies to improve adherence to intervention protocols, and any procedures for monitoring adherence (eg, drug tablet return, laboratory tests)                                                                                                                                                                                                                              | -                         |                                |
|                                                           | 11d      | Relevant concomitant care and interventions that are permitted or prohibited during the trial                                                                                                                                                                                                                                                                                  | -                         |                                |
| Outcomes                                                  | 12       | Primary, secondary, and other outcomes, including the specific measurement variable (eg, systolic blood pressure), analysis metric (eg, change from baseline, final value, time to event), method of aggregation (eg, median, proportion), and time point for each outcome. Explanation of the clinical relevance of chosen efficacy and harm outcomes is strongly recommended | -                         |                                |

| Section                                                             | Item No. | SPIRIT 2013 Item                                                                                                                                                                                                                                                                                                                                         | SPIRIT-Outcomes 2022 item                                                                                                                           | Location Reported <sup>b</sup> |
|---------------------------------------------------------------------|----------|----------------------------------------------------------------------------------------------------------------------------------------------------------------------------------------------------------------------------------------------------------------------------------------------------------------------------------------------------------|-----------------------------------------------------------------------------------------------------------------------------------------------------|--------------------------------|
|                                                                     | 12.1     |                                                                                                                                                                                                                                                                                                                                                          | Provide a rationale for the selection of the domain for the trial's primary outcome                                                                 |                                |
|                                                                     | 12.2     |                                                                                                                                                                                                                                                                                                                                                          | If the analysis metric for the primary outcome represents within-participant change, define and justify the minimal important change in individuals |                                |
|                                                                     | 12.3     |                                                                                                                                                                                                                                                                                                                                                          | If the outcome data collected are continuous but will be analyzed as categorical (method of aggregation), specify the cutoff values to be used      |                                |
|                                                                     | 12.4     |                                                                                                                                                                                                                                                                                                                                                          | If outcome assessments will be performed at several time points after randomization, state the time points that will be used for analysis           |                                |
|                                                                     | 12.5     |                                                                                                                                                                                                                                                                                                                                                          | If a composite outcome is used, define all individual components of the composite outcome                                                           |                                |
| Participant timeline                                                | 13       | Time schedule of enrolment, interventions (including any run-ins and washouts), assessments, and visits for participants. A schematic diagram is highly recommended (see Figure)                                                                                                                                                                         | -                                                                                                                                                   |                                |
| Sample size                                                         | 14       | Estimated number of participants needed to achieve study objectives and how it was determined, including clinical and statistical assumptions supporting any sample size calculations                                                                                                                                                                    | -                                                                                                                                                   |                                |
|                                                                     | 14.1     |                                                                                                                                                                                                                                                                                                                                                          | Define and justify the target difference between treatment groups (eg, the minimal important difference)                                            |                                |
| Recruitment                                                         | 15       | Strategies for achieving adequate participant enrolment to reach target sample size                                                                                                                                                                                                                                                                      | -                                                                                                                                                   |                                |
| <b>Methods: Assignment of interventions (for controlled trials)</b> |          |                                                                                                                                                                                                                                                                                                                                                          |                                                                                                                                                     |                                |
| Allocation:                                                         |          |                                                                                                                                                                                                                                                                                                                                                          |                                                                                                                                                     |                                |
| Sequence generation                                                 | 16a      | Method of generating the allocation sequence (eg, computer-generated random numbers), and list of any factors for stratification. To reduce predictability of a random sequence, details of any planned restriction (eg, blocking) should be provided in a separate document that is unavailable to those who enrol participants or assign interventions | -                                                                                                                                                   |                                |

| Section                                                   | Item No. | SPIRIT 2013 Item                                                                                                                                                                                                                                                                                                                                                                                             | SPIRIT-Outcomes 2022 item                                                                                            | Location Reported <sup>b</sup> |
|-----------------------------------------------------------|----------|--------------------------------------------------------------------------------------------------------------------------------------------------------------------------------------------------------------------------------------------------------------------------------------------------------------------------------------------------------------------------------------------------------------|----------------------------------------------------------------------------------------------------------------------|--------------------------------|
| Allocation concealment mechanism                          | 16b      | Mechanism of implementing the allocation sequence (eg, central telephone; sequentially numbered, opaque, sealed envelopes), describing any steps to conceal the sequence until interventions are assigned                                                                                                                                                                                                    | -                                                                                                                    |                                |
| Implementation                                            | 16c      | Who will generate the allocation sequence, who will enrol participants, and who will assign participants to interventions                                                                                                                                                                                                                                                                                    | -                                                                                                                    |                                |
| Blinding (masking)                                        | 17a      | Who will be blinded after assignment to interventions (eg, trial participants, care providers, outcome assessors, data analysts), and how                                                                                                                                                                                                                                                                    | -                                                                                                                    |                                |
|                                                           | 17b      | If blinded, circumstances under which unblinding is permissible, and procedure for revealing a participant's allocated intervention during the trial                                                                                                                                                                                                                                                         | -                                                                                                                    |                                |
| <b>Methods: Data collection, management, and analysis</b> |          |                                                                                                                                                                                                                                                                                                                                                                                                              |                                                                                                                      |                                |
| Data collection methods                                   | 18a      | Plans for assessment and collection of outcome, baseline, and other trial data, including any related processes to promote data quality (eg, duplicate measurements, training of assessors) and a description of study instruments (eg, questionnaires, laboratory tests) along with their reliability and validity, if known. Reference to where data collection forms can be found, if not in the protocol | -                                                                                                                    |                                |
|                                                           | 18a.1    |                                                                                                                                                                                                                                                                                                                                                                                                              | Describe what is known about the responsiveness of the study instruments in a population similar to the study sample |                                |
|                                                           | 18a.2    |                                                                                                                                                                                                                                                                                                                                                                                                              | Describe who will assess the outcome (eg, nurse, parent)                                                             |                                |
|                                                           | 18b      | Plans to promote participant retention and complete follow-up, including list of any outcome data to be collected for participants who discontinue or deviate from intervention protocols                                                                                                                                                                                                                    | -                                                                                                                    |                                |

| Section                    | Item No. | SPIRIT 2013 Item                                                                                                                                                                                                                                                                                                                      | SPIRIT-Outcomes 2022 item                                                                                                                                                                                                                    | Location Reported <sup>b</sup> |
|----------------------------|----------|---------------------------------------------------------------------------------------------------------------------------------------------------------------------------------------------------------------------------------------------------------------------------------------------------------------------------------------|----------------------------------------------------------------------------------------------------------------------------------------------------------------------------------------------------------------------------------------------|--------------------------------|
| Data management            | 19       | Plans for data entry, coding, security, and storage, including any related processes to promote data quality (eg, double data entry; range checks for data values). Reference to where details of data management procedures can be found, if not in the protocol                                                                     | -                                                                                                                                                                                                                                            |                                |
| Statistical methods        | 20a      | Statistical methods for analysing primary and secondary outcomes. Reference to where other details of the statistical analysis plan can be found, if not in the protocol                                                                                                                                                              | -                                                                                                                                                                                                                                            |                                |
|                            | 20a.1    |                                                                                                                                                                                                                                                                                                                                       | Describe any planned methods to account for multiplicity in the analysis or interpretation of the primary and secondary outcomes (eg, coprimary outcomes, same outcome assessed at multiple time points, or subgroup analyses of an outcome) |                                |
|                            | 20b      | Methods for any additional analyses (eg, subgroup and adjusted analyses)                                                                                                                                                                                                                                                              | -                                                                                                                                                                                                                                            |                                |
|                            | 20c      | Definition of analysis population relating to protocol non-adherence (eg, as randomised analysis), and any statistical methods to handle missing data (eg, multiple imputation)                                                                                                                                                       | -                                                                                                                                                                                                                                            |                                |
| <b>Methods: Monitoring</b> |          |                                                                                                                                                                                                                                                                                                                                       |                                                                                                                                                                                                                                              |                                |
| Data monitoring            | 21a      | Composition of data monitoring committee (DMC); summary of its role and reporting structure; statement of whether it is independent from the sponsor and competing interests; and reference to where further details about its charter can be found, if not in the protocol. Alternatively, an explanation of why a DMC is not needed | -                                                                                                                                                                                                                                            |                                |
|                            | 21b      | Description of any interim analyses and stopping guidelines, including who will have access to these interim results and make the final decision to terminate the trial                                                                                                                                                               | -                                                                                                                                                                                                                                            |                                |
| Harms                      | 22       | Plans for collecting, assessing, reporting, and managing solicited and spontaneously reported adverse events and other unintended effects of trial interventions or trial conduct                                                                                                                                                     | -                                                                                                                                                                                                                                            |                                |

| Section                         | Item No. | SPIRIT 2013 Item                                                                                                                                                                                                                                                                    | SPIRIT-Outcomes 2022 item | Location Reported <sup>b</sup> |
|---------------------------------|----------|-------------------------------------------------------------------------------------------------------------------------------------------------------------------------------------------------------------------------------------------------------------------------------------|---------------------------|--------------------------------|
| Auditing                        | 23       | Frequency and procedures for auditing trial conduct, if any, and whether the process will be independent from investigators and the sponsor                                                                                                                                         | -                         |                                |
| <b>Ethics and dissemination</b> |          |                                                                                                                                                                                                                                                                                     |                           |                                |
| Research ethics approval        | 24       | Plans for seeking research ethics committee/institutional review board (REC/IRB) approval                                                                                                                                                                                           | -                         |                                |
| Protocol amendments             | 25       | Plans for communicating important protocol modifications (eg, changes to eligibility criteria, outcomes, analyses) to relevant parties (eg, investigators, REC/IRBs, trial participants, trial registries, journals, regulators)                                                    | -                         |                                |
| Consent or assent               | 26a      | Who will obtain informed consent or assent from potential trial participants or authorised surrogates, and how (see Item 32)                                                                                                                                                        | -                         |                                |
|                                 | 26b      | Additional consent provisions for collection and use of participant data and biological specimens in ancillary studies, if applicable                                                                                                                                               | -                         |                                |
| Confidentiality                 | 27       | How personal information about potential and enrolled participants will be collected, shared, and maintained in order to protect confidentiality before, during, and after the trial                                                                                                | -                         |                                |
| Declaration of interests        | 28       | Financial and other competing interests for principal investigators for the overall trial and each study site                                                                                                                                                                       | -                         |                                |
| Access to data                  | 29       | Statement of who will have access to the final trial dataset, and disclosure of contractual agreements that limit such access for investigators                                                                                                                                     | -                         |                                |
| Ancillary and post-trial care   | 30       | Provisions, if any, for ancillary and post-trial care, and for compensation to those who suffer harm from trial participation                                                                                                                                                       | -                         |                                |
| Dissemination policy            | 31a      | Plans for investigators and sponsor to communicate trial results to participants, healthcare professionals, the public, and other relevant groups (eg, via publication, reporting in results databases, or other data sharing arrangements), including any publication restrictions | -                         |                                |
|                                 | 31b      | Authorship eligibility guidelines and any intended use of professional writers                                                                                                                                                                                                      | -                         |                                |

| Section                    | Item No. | SPIRIT 2013 Item                                                                                                                                                                               | SPIRIT-Outcomes 2022 item | Location Reported <sup>b</sup> |
|----------------------------|----------|------------------------------------------------------------------------------------------------------------------------------------------------------------------------------------------------|---------------------------|--------------------------------|
|                            | 31c      | Plans, if any, for granting public access to the full protocol, participant-level dataset, and statistical code                                                                                | -                         |                                |
| <b>Appendices</b>          |          |                                                                                                                                                                                                |                           |                                |
| Informed consent materials | 32       | Model consent form and other related documentation given to participants and authorised surrogates                                                                                             | -                         |                                |
| Biological specimens       | 33       | Plans for collection, laboratory evaluation, and storage of biological specimens for genetic or molecular analysis in the current trial and for future use in ancillary studies, if applicable | -                         |                                |

<sup>a</sup>It is strongly recommended that this checklist be read in conjunction with the SPIRIT (Standard Protocol Items: Recommendations for Interventional Trials) Statement paper for important clarification on the items. Amendments to the protocol should be tracked and dated. The SPIRIT checklist is copyrighted by the SPIRIT Group under the Creative Commons "Attribution-NonCommercial-NoDerivs 3.0 Unported" license and is reproduced with permission.

<sup>b</sup>Indicates page numbers and/or manuscript location: to be completed by authors.

Peer review only
