# Supplementary material for: Protocol of a randomised trial of teriparatide followed by zoledronic acid to reduce fracture risk in adults with osteogenesis imperfecta
Source: PubMed Central journal article supplement — BMJ Open. 2023 Nov 22;13(11):e078164. doi: 10.1136/bmjopen-2023-078164 (PMC10668140; doi:10.1136/bmjopen-2023-078164), 2023-11-22
Supplement: bmjopen-2023-078164.reviewer_comments.pdf [file bmjopen-2023-078164.reviewer_comments.pdf]

## PEER REVIEW HISTORY

BMJ Open publishes all reviews undertaken for accepted manuscripts. Reviewers are asked to complete a checklist review form (<http://bmjopen.bmj.com/site/about/resources/checklist.pdf>) and are provided with free text boxes to elaborate on their assessment. These free text comments are reproduced below.

## ARTICLE DETAILS

|                            |                                                                                                                                                        |
|----------------------------|--------------------------------------------------------------------------------------------------------------------------------------------------------|
| <b>TITLE (PROVISIONAL)</b> | Protocol of a randomised trial of teriparatide followed by zoledronic acid to reduce fracture risk in adults with osteogenesis imperfecta.             |
| <b>AUTHORS</b>             | Hald, Jannie; Keerie, Catriona; Weir, Christopher; Javaid, Kassim; Lam, Wayne; Osborne, Patricia; Walsh, Jennifer; Langdahl, Bente L.; Ralston, Stuart |

This article was not externally reviewed at BMJ Open. Protocols that have been independently assessed prior to submission to BMJ Open are usually fast-tracked to publication on the grounds that further substantial changes will not be possible. This independent assessment will usually be external, independent review for both a substantial grant award from a non-commercial or government funder and ethics approval.
